# Supplementary material for: Can patiromer allow for intensified renin–angiotensin–aldosterone system blockade with losartan and spironolactone leading to decreased albuminuria in patients with chronic kidney disease, albuminuria and hyperkalaemia? An open-label randomised controlled trial: MorphCKD
Source: PubMed Central journal article supplement — BMJ Open. 2022 Feb 21;12(2):e057503. doi: 10.1136/bmjopen-2021-057503 (PMC8862471; doi:10.1136/bmjopen-2021-057503), 2022-02-21
Supplement: bmjopen-2021-057503.draft_revisions.pdf [file bmjopen-2021-057503.draft_revisions.pdf]

# BMJ Open

BMJ Open is committed to open peer review. As part of this commitment we make the peer review history of every article we publish publicly available.

When an article is published we post the peer reviewers' comments and the authors' responses online. We also post the versions of the paper that were used during peer review. These are the versions that the peer review comments apply to.

The versions of the paper that follow are the versions that were submitted during the peer review process. They are not the versions of record or the final published versions. They should not be cited or distributed as the published version of this manuscript.

BMJ Open is an open access journal and the full, final, typeset and author-corrected version of record of the manuscript is available on our site with no access controls, subscription charges or pay-per-view fees (<http://bmjopen.bmj.com>).

If you have any questions on BMJ Open's open peer review process please email [info.bmjopen@bmj.com](mailto:info.bmjopen@bmj.com)

# BMJ Open

**Can Patiromer allow for intensified RAAS-blockade with Losartan and Spironolactone leading to decreased albuminuria in patients with CKD, albuminuria and hyperkalaemia? An open-label randomised controlled trial - MorphCKD**

|                               |                                                                                                                                                                                                                                                                                                                                                                                                                                                                                       |
|-------------------------------|---------------------------------------------------------------------------------------------------------------------------------------------------------------------------------------------------------------------------------------------------------------------------------------------------------------------------------------------------------------------------------------------------------------------------------------------------------------------------------------|
| Journal:                      | <i>BMJ Open</i>                                                                                                                                                                                                                                                                                                                                                                                                                                                                       |
| Manuscript ID                 | bmjopen-2021-057503                                                                                                                                                                                                                                                                                                                                                                                                                                                                   |
| Article Type:                 | Protocol                                                                                                                                                                                                                                                                                                                                                                                                                                                                              |
| Date Submitted by the Author: | 20-Sep-2021                                                                                                                                                                                                                                                                                                                                                                                                                                                                           |
| Complete List of Authors:     | Mårup, Frederik; Aarhus University, Dept. of Biomedicine; Aarhus University Hospital, Dept. of Renal Medicine<br>Peters, Christian; Aarhus University, Dept. of Clinical Medicine; Aarhus University Hospital, Dept. of Renal Medicine<br>Christensen, Jeppe; Aalborg University Hospital, Department of Nephrology; Aalborg University, Department of Clinical Medicine<br>Birn, Henrik; Aarhus University, Dept. of Biomedicine; Aarhus University Hospital, Dep. of Renal Medicine |
| Keywords:                     | Chronic renal failure < NEPHROLOGY, Adult nephrology < NEPHROLOGY, Diabetic nephropathy & vascular disease < DIABETES & ENDOCRINOLOGY, Nephrology < INTERNAL MEDICINE                                                                                                                                                                                                                                                                                                                 |
|                               |                                                                                                                                                                                                                                                                                                                                                                                                                                                                                       |

SCHOLARONE™  
Manuscripts

1  
2  
3  
4 **TITLE:** Can Patiromer allow for intensified RAAS-blockade with Losartan and Spironolactone leading to  
5 decreased albuminuria in patients with CKD, albuminuria and hyperkalaemia? An open-label randomised  
6 controlled trial - MorphCKD  
7

8 **AUTHORS**  
9

10 Frederik Husum Mårup (FHM), MD, Department of Renal Medicine, Aarhus University Hospital, Palle Juul-  
11 Jensens Boulevard 99, 8200 Aarhus N, Denmark, [fremaa@rm.dk](mailto:fremaa@rm.dk), phone: +45 2148 8731  
12

13 Christian Daugaard Peters (CDP), MD, Department of Renal Medicine, Aarhus University Hospital, Palle Juul-  
14 Jensens Boulevard 99, 8200 Aarhus N, Denmark, [chipte@rm.dk](mailto:chipte@rm.dk)  
15

16 Jeppe Hagstrup Christensen (JHC), MD, DMSc Professor, Department of Nephrology, Aalborg University  
17 Hospital, Mølleparkvej 4, 9000 Aalborg, Denmark, [jeppe.hagstrup.christensen@rn.dk](mailto:jeppe.hagstrup.christensen@rn.dk)  
18

19 Henrik Birn (HB), MD, PhD, Professor, Department of Renal Medicine, Aarhus University Hospital, Palle Juul-  
20 Jensens Boulevard 99, 8200 Aarhus N, Denmark, [hb@biomed.au.dk](mailto:hb@biomed.au.dk), phone: +45 6171 7870, Department of  
21 Biomedicine, Aarhus University, Wilhelm Meyer Allé 3, 8000 Aarhus C  
22  
23  
24  
25

26 Corresponding Author: FHM

27 Primary Sponsor: HB

28 Principal Investigator (PI): FHM

29 Contact for public queries: Department of Renal Medicine, Aarhus University Hospital

30 Contact for Scientific Queries: FHM  
31  
32  
33  
34  
35  
36

37 Word Count: 4877  
38  
39  
40

41 **KEYWORDS**

42 Patiromer

43 Renal Insufficiency, Chronic

44 Renin-Angiotensin-Aldosterone System

45 Albuminuria

46 Hyperkalaemia

47 Mineralocorticoid Receptor Antagonists

48 Angiotensin Receptor Antagonists  
49  
50  
51  
52  
53  
54  
55  
56  
57  
58  
59  
60

## ABSTRACT

### INTRODUCTION

Chronic Kidney Disease (CKD) is associated with significantly increased morbidity and mortality. No specific treatment of the underlying condition is available for the majority of patients, but ACE-inhibitors (ACE-I) and angiotensin II-receptor blockers (ARB) slows progression in albuminuric CKD. Adding a mineralocorticoid receptor-antagonist (MRA) like spironolactone has an additive effect. However, Renin-angiotensin-aldosterone system (RAAS)-blockade increases the risk of hyperkalaemia which is exacerbated by the presence of CKD. Thus, hyperkalaemia may prevent optimal use of RAAS-blockade in some patients.

This project hypothesizes that adding a potassium binder (patiromer) allows for improved RAAS-blockade including the use of MRA, thereby reducing albuminuria in patients with albuminuric CKD where full treatment is limited by hyperkalemia.

If successful, the study may lead to improved treatment of this subgroup of CKD patients. Furthermore, the study will examine the feasibility of potassium binders in patients with CKD.

### METHODS AND ANALYSIS

An open label, randomised controlled trial including 140 patients with eGFR 25-60 mL/min/1.73m<sup>2</sup>, a urinary albumin/creatinine ratio (UACR) > 500 mg/g (or 200mg/g if diabetes mellitus) and a current or two previous plasma-potassium >4.5mmol/L. Patients who develop hyperkalemia >5.5 mmol/L during a run-in phase, in which RAAS-blockade is intensified with the possible addition of spironolactone, are randomised to 12-month treatment with maximal tolerated ACE-I/ARB and spironolactone with or without patiromer.

The primary endpoint is the difference in UACR measured at randomisation and 12 months compared between the two groups. Secondary endpoints include CKD progression, episodes of hyperkalaemia, blood pressure, eGFR, markers of cardiovascular disease, diet and quality of life.

### ETHICS AND DISSEMINATION

This study is approved by The Central Denmark Region Committees on Health Research Ethics (REFNO 1-10-72-110-20) and is registered in the EudraCT database (REFNO 2020-001595-15). Results will be presented in peer-reviewed journals, at meetings and at international conferences.

## ARTICLE SUMMARY

### STRENGTHS AND LIMITATIONS OF THIS STUDY

- This study uses a robust randomised controlled design, investigating if patiromer, through increased RAAS-blockade, can reduce albuminuria in patients with CKD and hyperkalaemia.
- The selective run-in phase only allows randomisation of patients where RAAS-blockade is proven to be limited by hyperkalaemia.
- A one-year follow-up will examine long-term tolerability of patiromer in CKD patients, testing if such a treatment regime is feasible.
- The limited sample size and one-year follow-up that does not allow for evaluation of 'hard' endpoints such as time to renal death or decrease in eGFR

## INTRODUCTION

Chronic kidney disease (CKD) is among the most common and fastest growing diseases worldwide. It is associated with substantial comorbidity and mortality[1]. No curative treatment is currently available for the majority of CKD patients, and current interventions aim to halt or slow the natural progression of the disease. Albuminuria is a well-established predictor of end stage renal disease (ESRD). The risk of progressing to ESRD is up to 75 times higher among CKD patients with significant albuminuria compared to patients without albuminuria[2]. Several studies have shown that treatment with inhibitors of the renin-angiotensin-aldosterone system (RAAS) such as angiotensin-converting enzyme inhibitors (ACE-Is) or angiotensin II receptor blockers (ARBs) not only lower blood pressure (BP) but also reduce albuminuria and slow CKD progression in both diabetic and non-diabetic CKD[3,4]. RAAS-blockade, in particular the use of ACE-I or ARB, is considered first-line treatment in patients with CKD, hypertension and albuminuria. The response is dose-dependent, and higher doses further reduce albuminuria[5]. Evidence suggests that the change in albuminuria correlates with the protection provided and therefore serves as a surrogate marker of disease progression[6,7]. Other studies have shown that reducing albuminuria in CKD patients lowers the cardiovascular risk[8]. Angiotensin II stimulates vascular smooth muscle cells, monocytes, fibrosis, inflammation, oxidative stress and vascular endothelial damage[9–13], and RAAS-blockade may have anti-fibrotic and anti-inflammatory effects[14,15]. In concordance, treatment leads to regression of left ventricular hypertrophy, an independent and strong marker of cardiovascular morbidity and mortality[16,17]. Cardiovascular risk can be further assessed from arterial stiffness (pulse wave velocity (PWV) and central BP) and blood biomarkers such as endothelin-1, NT-proBNP and TnI[18–20].

Aldosterone is a regulator of blood pressure through fluid and electrolyte homeostasis primarily from its action on ENaC channels and the Na<sup>+</sup>/K<sup>+</sup> pump in the distal nephron and collecting ducts. Evidence strongly support an additional, direct pathophysiological role for aldosterone in the development of kidney and cardiovascular disease. Mineralocorticoid receptor (MR) activation induces inflammation, oxidative stress and fibrosis[21,22] and leads to glomerulosclerosis and cardiac fibrosis [23,24], which increases the risk of kidney function decline, albuminuria and cardiovascular disease. Blood aldosterone levels increase as estimated glomerular filtration rate (eGFR) deteriorates, and CKD is considered a state of relative hyperaldosteronism [25,26]. RAAS blockade using ARB/ACE-I insufficiently lowers the aldosterone level, and plasma concentration typically rises after 6-12 months of treatment; a phenomenon known as aldosterone escape [27]. MR-antagonists (MRAs) such as spironolactone or eplerenone alone or in combination with ACE-I/ARB reduces albuminuria by 25-40%[28,29]. This effect is likely independent from and not driven by a reduction in BP alone[30]. A large number of studies have suggested potential benefits of treatment with MRA in CKD with persistent albuminuria. This notion was emphasized by the recent FIDELIO-DKD trial. The trial found that the addition of the MRA finerenone to ACE-I/ARB treatment in patients with CKD, type 2 diabetes and albuminuria significantly reduced the risk of renal outcomes (time to renal death, eGFR decline over time and/or death from renal causes) and cardiovascular risk[31].

Despite inherent benefits, RAAS blockade may be hampered by fear of hyperkalaemia. Severe hyperkalaemia may cause life threatening cardiac arrhythmias[32]. CKD results in a reduced ability to excrete potassium and patients are at significant risk of hyperkalaemia, especially in the presence of other comorbidities such as diabetes, heart failure (HF) and old age[33,34]. Treatment with ACE-Is or ARBs as well as MRAs further inhibits renal potassium excretion, augmenting the risk of hyperkalaemia[35,36]. Thus, high potassium levels often limit the optimal use of RAAS blockade in many CKD patients[34]. Novel third generation nonsteroidal selective MRAs such as finerenone has a lower risk of causing hyperkalaemia compared to older generation MRAs, but the number of patients discontinuing treatment due to

1  
2  
3  
4 hyperkalaemia is still 2.5-fold higher compared to placebo[31]. Other ongoing clinical trials evaluating the  
5 effect of ACE-I or ARB combined with MRAs in CKD exclude patients with hyperkalaemia[21]. Thus, CKD  
6 patients with hyperkalaemia may be barred from the potential benefits of complete RAAS blockade  
7 including MRA.  
8

9  
10 In recent years, novel potassium-binding agents have been introduced. These include patiomer (Veltassa),  
11 a non-absorbable sodium-free powder for oral use, which binds potassium in the gastrointestinal tract,  
12 thereby increasing fecal excretion and lowering plasma (P) potassium[34]. *In vitro* studies have shown the  
13 potassium-binding capacity of patiomer to be 1.5-2.5 times that of traditional polystyrene sulfonate based  
14 potassium-binding agents[37]. Patiomer significantly lowers P-potassium in CKD patients with eGFR 15-  
15 60mL/min with or without RAAS blockade[38,39]. Several studies have proposed the use of patiomer to  
16 allow for increased RAAS blockade in patients with CKD, hyperkalaemia and suboptimal RAAS blockade  
17 treatment. A analysis conducted in the UK concluded that patiomer had a beneficial cost-utility profile in  
18 such patients[40]. Patiomer was well-tolerated by patients in clinical trials. A pooled analysis of 666  
19 patients, of whom 149 received treatment for >12 months, found no serious adverse reactions related to  
20 patiomer. Although hyperkalaemia may also be addressed through dietary restrictions, these have limited  
21 effect and a profound impact on patient's lifestyle and freedom. They further limit the intake of fresh fruits  
22 and vegetables normally considered to reduce the risk of cardiovascular disease[41]. It is currently  
23 unknown whether treatment with patiomer will allow for an increased consumption of such foods with a  
24 potential benefit on health and quality of life (QoL).  
25  
26  
27  
28  
29

### 30 **Aims and Hypotheses**

31  
32 This trial aims to establish if the use of a potassium binding agent (patiomer) in patients with moderate or  
33 advanced CKD (eGFR 25-60 mL/min/1.73m<sup>2</sup>) leads to a reduction in albuminuria by the concomitant  
34 intensified use of RAAS-inhibitors (losartan and/or spironolactone). In secondary analyses, it will examine  
35 the effects of this approach on markers of cardiovascular function, dietary habits (including fruit and  
36 vegetable intake) and quality-of-life as well as the potential risks; monitoring blood pressure, episodes of  
37 hyperkalaemia and renal function.  
38  
39

40 Thus, the study will address the hypotheses that treatment with patiomer and intensified RAAS-blockade  
41 in patients with eGFR 25-60mL/min, albuminuria and a tendency of high potassium levels leads to:  
42

- 43 1. A significant reduction in albuminuria when compared to patients in maximal RAAS-blockade as  
44 allowed by their P-potassium levels without patiomer
- 45 2. A significant reduction in albuminuria during treatment
- 46 3. A reduced PWV and left ventricular mass (LVM) along with improvement in blood biomarkers of  
47 cardiovascular function
- 48 4. An increased intake of healthy foods and higher quality of life  
49

### 50 **METHODS AND ANALYSIS**

51  
52 The MorphCKD study is an investigator-initiated, multicenter, open label, parallel group, superiority  
53 randomised controlled trial (RCT). Randomisation is performed as a block randomisation with 1:1  
54 allocation.  
55  
56  
57  
58  
59  
60

1  
2  
3  
4 The study will include patients from the outpatient clinics at the renal departments in Aarhus, Aalborg,  
5 Holstebro and Viborg, Denmark. The primary site, Aarhus, will also include patients from the diabetes  
6 outpatient clinic and within the hospital public admission area (see under “recruitment”).  
7

8 The study is divided into a run-in phase of 2-8 weeks followed by randomisation to a treatment phase  
9 involving 52 weeks of treatment with or without patiromer (see figure 1). The run-in phase will determine if  
10 maximized RAAS-blockade, including treatment with an MRA, leads to clinically significant hyperkalaemia  
11 (>5.5mmol/L) despite dietary counselling, thereby identifying the patients that may benefit from treatment  
12 with patiromer who qualify for randomisation to the treatment phase.  
13  
14  
15  
16

## 17 **FIGURE1 Flowchart of the trial design**

### 18 **Participants**

19 A total of 140 patients fulfilling the eligibility criteria below will be included.  
20  
21

#### 22 **Inclusion criteria:**

- 23 1. Age 18-80
- 24 2. eGFR 25-60 mL/min/1.73m<sup>2</sup>
- 25 3. Current P-potassium >4.5mmol/L or P-potassium >4.5mmol/L twice within 24 months
- 26 4. Urine albumin-creatinine ratio (UACR) >500mg/g or 200mg/g and diabetes
- 27  
28  
29

#### 30 **Exclusion criteria:**

- 31 1. Known allergies to both ACE-I and losartan or spironolactone or patiromer
- 32 2. A history of kidney transplantation or active on the waiting list
- 33 3. ESRD (defined as the need for dialysis or kidney transplantation)
- 34 4. Any renal disease requiring or being expected to require specific immunosuppressive therapy for
- 35 the duration of the trial
- 36 5. Pregnancy or inability to use contraception
- 37 6. Regular need for trimethoprim or NSAIDs
- 38 7. Current treatment with aliskiren
- 39 8. Disseminated cancer disease
- 40 9. Addison’s disease
- 41 10. HF defined as ejection fraction < 40% or active treatment at a HF clinic or similar
- 42 11. Porphyrria
- 43 12. Severe constipation with a regular use of laxatives or previous recurrent ileus
- 44 13. Fructose/galactose-intolerance
- 45 14. Severe liver insufficiency (Child-Pugh Score B-C)
- 46 15. Clinically significant severe renal artery stenosis
- 47 16. Investigator’s evaluation that participation in the trial may cause serious harm to the patient (e.g.
- 48 previous severe acute kidney injury (AKI) in relation to RAAS-blockade)
- 49 17. Initiation of an SGLT2-inhibitor within 30 days prior to inclusion
- 50  
51  
52  
53  
54  
55

### 56 **Interventions and randomisation**

57 Dietary counselling to limit potassium intake is provided at inclusion. Patients not treated with ACE-I/ARB at  
58 inclusion will commence losartan 50mg/day for the run-in phase (step 1 below). Patients already treated  
59  
60

with ACE-I/ARB will continue this treatment at the current dose with the addition of an MRA (step 3 below). Based on tolerability, RAAS-blockade is increased in four steps:

1. Losartan 50mg/day
2. Losartan 100mg/day
3. Losartan 100mg/day or current ACE-I/ARB + spironolactone 25mg/day
4. Losartan 100mg/day or current ACE-I/ARB + spironolactone 50mg/day

Blood samples and home BP monitoring will be performed 1-2 weeks after each dose change and the patient is contacted by phone to record home BP and to inform about blood results. Tolerability is evaluated by P-potassium, creatinine, BP and side effects. The dose of losartan or spironolactone is reduced to the previous step and the patient proceeds to randomisation if P-potassium is  $>5.5\text{mmol/L}$ .

Patients that reach step four without significant hyperkalaemia are excluded from the study.

Patients completing the run-in phase with an episode of significant hyperkalaemia ( $>5.5\text{mmol/L}$ ), a UACR  $>300\text{mg/g}$  or  $150\text{mg/g}$  and diabetes, a most recent P-potassium  $>4.0\text{mmol/L}$  and no other contraindications (e.g. AKI) to continued and increased RAAS-blockade are randomised to open-label treatment in one of two regimes:

1. Patiromer with stepwise dose-increase/-decrease with increased RAAS-blockade in addition to standard clinical care and dietary counselling. Patiromer will be dosed based on P-potassium and tolerability until maximal RAAS-blockade with P-potassium  $\leq 5.5\text{mmol/L}$ .
2. No patiromer (control group) with standard clinical care, dietary counselling and maximal RAAS-blockade with P-potassium  $\leq 5.5\text{mmol/L}$ .

Permuted block randomisation with random varying block sizes of 2, 4 and 6 is used to allocate patients to the patiromer- or control group at a 1:1 ratio, stratified by albuminuria  $>1000\text{mg/g}$  (Yes/No) and diabetes (Yes/No). The Random allocation list is generated and uploaded to REDCap by an independent service provider (Clinical Trial Unit, Dept. of Clinical Medicine, Aarhus University) maintaining proper concealment of randomisation.

After randomisation, patients are followed for up to 52 weeks with blood sampling and outpatient visits every 3 months and allowing for additional visits if considered clinically required based on the assessment of the local investigator.

The dose of study drugs (RAAS-blockade) is determined by the four steps previously described, aiming at the possible highest step with a P-potassium  $<5.5\text{mmol/L}$ . Dose increases are only allowed on planned consultations (phone or outpatient clinic), but decreases may be introduced at any point depending on the results of blood test, BP or other adverse effects. In the patiromer group, patiromer is prescribed as tolerated at a daily dose of 8,4g, 16,8g or 25,2g in order to maintain P-potassium  $<5.5\text{mmol/L}$ . The dosing of patiromer is increased concomitantly with any increase in RAAS-blockade, unless P-potassium is  $\leq 4.6\text{mmol/L}$ . RAAS-blockade is decreased if hyperkalaemia  $>5.5\text{mmol/L}$  is recorded at the highest tolerated patiromer dose.

All study drugs are stopped at the last outpatient visit after 52 weeks. Patients entering the study on ACE-I/ARB will continue this treatment without patiromer. Blood and urine samples are collected 4 weeks later for the evaluation of eGFR, albuminuria and P-potassium after discontinuation of study drugs.

#### **Additional medication**



Any inhibitors of the RAAS-system other than those mentioned above as well as additional potassium binders are not allowed during the study period. Hypertension is treated aiming at a systolic BP between 110-130mmHg in both groups. All anti-hypertensives, except additional inhibitors of the RAAS-system, may be used as per the discretion of the treating physician. Loop and thiazide diuretics may be prescribed for hypertension and/or fluid retention. Hypomagnesaemia is treated with oral magnesium supplements. Study drugs including losartan, spironolactone and patiromer can be reduced or suspended depending on blood pressure, hyperkalaemia as per protocol or any side effects deemed to outweigh the benefit of the treatment (e.g. AKI, gastrointestinal intolerance, biochemical abnormalities). SGLT2-inhibitors may not be prescribed during the trial.

## Endpoints

The primary endpoint is:

- The difference in UACR from randomisation to end of treatment compared between the two groups. This is measured as an average of two morning spot UACR samples collected both at randomisation and at the last study visit

Secondary endpoints include:

- The difference in 24h urine albumine from randomisation to end of treatment compared between the two groups
- The difference in albuminuria (evaluated by morning spot UACR and 24h urine collection) at the end of treatment between the two groups
- The difference in the extent of RAAS-blockade (ACE-I/ARB and MRA) at the end of treatment between the two groups
- The difference in kidney function (eGFR and urine creatinine clearance) at the end of treatment and the changes in eGFR from randomisation to end of treatment between the two groups
- The difference in BP (ambulatory and 24h) at the end of treatment and the changes in BP from randomisation to end of treatment between the two groups
- The difference in PWV/pulse wave analysis (PWA) at the end of treatment and the changes in PWV/PWA from randomisation to end of treatment between the two groups
- The difference in LVM (ECG) at the end of treatment and the changes in LVM from randomisation to end of treatment between the two groups
- The difference in cardiac biomarkers at the end of treatment and the changes in cardiac biomarkers from randomisation to end of treatment between the two groups
- The difference in P-potassium at the end of treatment between the two groups
- The difference in the number of episodes with severe hyperkalaemia (>6.2mmol/L) from randomisation to end of treatment between the two groups
- The difference in the number of episodes with AKI (KDIGO stage 1-3) from randomisation to end of treatment between the two groups
- The difference in the questionnaire base assessment of the consumption of fruits and vegetables at the end of treatment and the changes in fruits and vegetables consumption from randomisation to end of treatment between the two groups
- The difference in QoL at the end of treatment and the changes in QoL from randomisation to end of treatment between the two groups

## Sample size and power calculation

1  
2  
3  
4 The study will include 140 patients under the assumption that 30% will not meet randomisation criteria,  
5 leaving 98 participants (49 in each group) for randomisation. This will provide 80% power to detect a  
6 clinically relevant 1.5-fold greater reduction in the amount of albuminuria in the patiromer group  
7 compared to the control group, with a risk of type 1 error of 0.05 assuming an 80% coefficient of variation  
8 in the change of UACR[42]. The study will continue as long as the number of randomised participants is  
9 expected to be no less than 55% (54 patients), which will provide power to detect a 1.75-fold greater  
10 reduction in the amount of albuminuria.  
11  
12

### 13 **Recruitment**

14  
15 All patients from the renal outpatient clinics at the three centers and all patients serviced by Aarhus  
16 University Hospital (covering a population of approx. 900,000) who have provided a blood sample within  
17 the last 2 years are prescreened. The prescreening algorithm uses the LABKA II database containing the  
18 result of all blood samples analyzed within the relevant regions and identifies patients aged 18-80 with a  
19 history (within 2 years) of P-potassium > 4.5mmol/L, UACR >200mg/g and eGFR 25-60 mL/min/1.73m<sup>2</sup>. The  
20 resulting patient records including blood samples are manually screened by a local investigator. Potentially  
21 eligible patients are contacted with the participant information by letter. In addition, patients in the  
22 nephrology outpatient clinics in Aarhus, Aalborg, Holstebro and Viborg and the diabetes outpatient clinic in  
23 Aarhus are contacted in person at their next appointment. After written informed consent they are  
24 screened for inclusion including blood samples to ensure that they meet the inclusion criteria at the time of  
25 inclusion.  
26  
27  
28

### 29 **Data collection**

30  
31 The patient's medical history including current treatment is registered at inclusion. Patient height is  
32 measured at inclusion and weight at every visit. A physical examination including vital signs are performed  
33 at inclusion, randomisation and final visit. A urine sample for UACR is collected at inclusion, twice at  
34 randomisation and final visit for the primary outcome and at every three-month-visit during the treatment  
35 phase. If possible, a morning sample is preferred. Timed 24h urine samples are collected at randomisation  
36 and 52 weeks. P-potassium, creatinine, eGFR and sodium are measured at inclusion, weekly during the run-  
37 in phase, during titration of RAAS-blockade and every 3 months in the outpatient clinic. P-total CO<sub>2</sub> and  
38 ionized calcium are measured at inclusion, randomisation and every 3-month visit. P-magnesium is  
39 measured at all visits during the maintenance phase in the patiromer group. Cardiac biomarkers  
40 (Endothelin-1, NT-proBNP and Tnl), ECG, blood samples evaluating biomarkers of fruit and vegetable  
41 consumption (lutein,  $\beta$ -cryptoxanthin,  $\alpha$ - and  $\beta$ -carotene, lycopene and vitamin C[43]), PWV and PWA as a  
42 measure of arteriosclerosis, SF-36[44] questionnaire measuring QoL, MyFood24[45] food diaries and 24h  
43 ABPM are all performed at randomisation and 52 weeks. Please refer to table 1 for a timeline of data  
44 collection.  
45  
46  
47  
48  
49  
50  
51  
52  
53  
54  
55  
56  
57  
58  
59  
60

**Table 1: Study timeline and visits**

| Timeline (weeks)                                                              | Inclusion<br>-8 | -6 | -4* | -2* | t <sub>0</sub><br>Randomisation<br>/(exclusion) | 2* | 4* | 13 | 26 | 39 | 52 | 56 |
|-------------------------------------------------------------------------------|-----------------|----|-----|-----|-------------------------------------------------|----|----|----|----|----|----|----|
| <b>STUDY PHASE:</b>                                                           | Run-in phase    |    |     |     | Maintenance phase                               |    |    |    |    |    |    |    |
| <b>INTERVENTIONS:</b>                                                         |                 |    |     |     |                                                 |    |    |    |    |    |    |    |
| Increased RAAS-blockade                                                       | →               |    |     |     |                                                 |    |    |    |    |    |    |    |
| Patiromer-treatment<br>(intervention group)<br>and/or RAAS-blockade titration |                 |    |     |     |                                                 |    |    |    |    |    |    |    |
| <b>ASSESSMENTS:</b>                                                           |                 |    |     |     |                                                 |    |    |    |    |    |    |    |
| Eligibility screen                                                            | x               |    |     |     |                                                 |    |    |    |    |    |    |    |
| Informed consent                                                              | x               |    |     |     |                                                 |    |    |    |    |    |    |    |
| Pregnancy test (if fertile<br>woman)                                          | x               |    |     |     |                                                 |    |    |    |    |    |    |    |
| Medical record                                                                | x               |    |     |     |                                                 |    |    |    |    |    |    |    |
| Physical examination                                                          | x               |    |     |     | x                                               |    |    |    |    |    |    | x  |
| Weight                                                                        | x               |    |     |     | x                                               |    |    | x  | x  | x  | x  |    |
| Dietary counselling                                                           | x               |    |     |     |                                                 |    |    |    |    |    |    |    |
| P-Creatinine, eGFR, P-<br>Potassium, P-Sodium                                 | x               | X  | x   | x   | x                                               | x  | x  | x  | x  | x  | x  | x  |
| P-magnesium (patiromer<br>group)                                              |                 |    |     |     | x                                               | x  | x  | x  | x  | x  | x  |    |
| P-total CO <sub>2</sub> , P-ionized Calcium                                   | x               |    |     |     | x                                               |    |    | x  | x  | x  | x  | x  |
| BpTRU® or similar local ABPM                                                  | x               |    |     |     | x                                               |    |    | x  | x  | x  | x  |    |
| 24h ABPM                                                                      |                 |    |     |     | x                                               |    |    |    |    |    | x  |    |
| At-home ABPM                                                                  |                 | x  | x   | x   |                                                 | x  | x  |    |    |    |    |    |
| UACR                                                                          | x               | x  | x   | x   | xx                                              |    |    | x  | x  |    | xx | x  |
| Questionnaire – Side effects                                                  | x               |    |     |     | x                                               |    |    | x  | x  | x  | x  |    |
| Questionnaire – SF-36[44]<br>(QoL)                                            |                 |    |     |     | x                                               |    |    |    |    |    | x  |    |
| Questionnaire – MyFood24[45]                                                  |                 |    |     |     | x                                               |    |    |    |    |    | x  |    |
| Carotenoids and C-Vitamin                                                     |                 |    |     |     | x                                               |    |    |    |    |    | x  |    |
| 24h urine collection                                                          |                 |    |     |     | x                                               |    |    |    |    |    | x  |    |
| PWA/PWV                                                                       |                 |    |     |     | x                                               |    |    |    |    |    | x  |    |
| ECG                                                                           |                 |    |     |     | x                                               |    |    |    |    |    | x  |    |
| Endothelin-1, NT-proBNP and<br>Tnl                                            |                 |    |     |     | x                                               |    |    |    |    |    | x  |    |
| Pill count                                                                    |                 |    |     |     | x (x)                                           |    |    | x  | x  | x  | x  |    |
| <b>TYPE OF VISIT:</b>                                                         |                 |    |     |     |                                                 |    |    |    |    |    |    |    |
| Phone consultation                                                            |                 | x  | x   | x   |                                                 | x  | x  |    |    |    |    |    |
| Outpatient clinic                                                             | x               |    |     |     | x (x)                                           |    |    | x  | x  | x  | x  |    |

\*Only If RAAS-blockade has been increased. During the run-in phase, the patient proceeds directly to randomisation if P-potassium > 5.5mmol/L.

Questionnaires and food diaries may be filled in online prior to the visit using REDCap or the Myfood24 website. An invitation with a unique link is sent to the patient via e-mail. Alternatively, they are completed with the assistance of the investigator on the day of the visit. Vital signs are measured using BpTRU® or equivalent at every visit and with an automatic digital blood pressure monitor at home for phone consultations. Pill counts are done at every visit to assess compliance. Patients are asked if and to what extent they have taken the study drugs at all contacts. Adherence techniques such as morning routines and medication in relation to meals are discussed if required.

1  
2  
3  
4 Blood and urine biochemical analyses are performed at local biochemical laboratories using standard  
5 automated assay. Reference intervals have been standardized on a national level and all Danish laboratory  
6 uses these for reference. The UACR at randomisation and final visit is calculated as an average of 2  
7 measurements to minimize variability[46]. The patient is carefully instructed to provide morning urine  
8 sample. Urine collection, including 24h urine collection, is performed by the patient at home prior to the  
9 randomisation and 12-month-visit. PWV and PWA is measured using the Sphygmocor system. Applanation  
10 tonometry is applied on the carotid, femoral, and radial artery. A minimum operator index of 85 is used.  
11 Length is measured as 80% of the distance from the carotid artery to the femoral artery. Home BP is  
12 measured three times in the morning and evening for three days. An average of day 2 and 3 is reported.  
13 Twenty-four-hour ABPM is recorded with measurements every 30 minutes. ECG is recorded by an  
14 experienced nurse. Each centers' personnel will be trained and instructed in all study procedures by the  
15 study PI.  
16  
17  
18

### 19 **Data management**

20  
21 Study data, including adverse events (AE) and serious adverse events/reactions (SAE/SAR), will be collected  
22 and managed using REDCap electronic data capture tools hosted at Aarhus University[47,48]. All data are  
23 entered electronically by the local investigator at each site. Original data is stored in the patients' electronic  
24 records or in a participant file. Participant files are stored in a secure place and kept for 15 years after end  
25 of study. Data will be exported from RedCap for final analysis using a suitable statistical software package.  
26  
27

### 28 **Statistical methods**

29  
30 The primary endpoint is analyzed using a t-test comparing the differences in UACR between randomisation  
31 and 12 months between the two groups. The ratio between groups with confidence intervals and the P-  
32 value will be reported. A secondary two-way repeated measures ANOVA including UACR at randomisation,  
33 3, 6, 9 and 12 months is performed and the P-value is reported. The data is analyzed as intention-to-treat  
34 with a secondary treated-as analysis. A separate t-test will compare the difference in UACR from  
35 randomisation to the time patiromer is discontinued. Data from patients discontinuing treatment before 12  
36 months of follow-up is included using carry-over of the last available dataset before stopping. Missing data  
37 for the primary endpoint will be replaced by the most recent observation carried over. Previous studies  
38 have shown that most of the effect of increased RAAS-blockade on albuminuria is seen early after  
39 treatment initiation with little change thereafter, suggesting that the UACR at the closest possible time-  
40 point is a fair proxy measure of the 12-month value. Imputations may be applied for secondary analyses if  
41 feasible. All variables are analyzed for normal distribution and skewed data are log-transformed when  
42 appropriate. Non-normally distributed variables on both the standard- and log-scale are analyzed using  
43 non-parametric testing. Repeated measurements are analyzed by a linear model when feasible.  
44  
45  
46

### 47 **Safety measures**

48  
49 Adverse events, defined as any medical occurrence in a trial participant without regard to the possible  
50 cause, are collected from when the consent has been signed and until final visit. Participants are asked  
51 about any new such events at each contact and will fill out a questionnaire at each outpatient clinic visit.  
52 Serious adverse events will be reported directly to the PI and sponsor. Investigators will evaluate any  
53 adverse event's possible relation to study drugs based on temporal relationship, known mechanism of  
54 action and known side effects for classification of adverse reactions.  
55  
56

57 The following individual safety-outcomes are evaluated by the investigator at each contact:  
58  
59  
60

1. A decline in eGFR > 30% from inclusion, 20% from previous visit or 5 mL/min/1.73 m<sup>2</sup> from previous visit if eGFR < 25 mL/min/1.73 m<sup>2</sup> should lead to a temporary reduction or discontinuation of spironolactone and/or ACE-I/ARB (Losartan or other)
2. An increase in P-creatinine > 100% from the previous visit, the possible need for acute dialysis or other findings suggesting severe AKI leads to admittance for treatment
3. If P-potassium is >5.5mmol/L on maximal patiromer dose, RAAS-blockade is reduced by 50% or spironolactone is discontinued. P-potassium is repeated within two days or as soon as possible
4. If P-potassium is > 5.9mmol/L, ACE-I/ARB and spironolactone are temporarily discontinued. P-potassium is repeated within one day
5. If P-potassium is > 6.2mmol/L, the patient is admitted and treated in accordance with local guidelines. ACE-I/ARB and spironolactone are temporarily discontinued.
6. If P-magnesium is < 0.6mmol/L, the patient is treated with oral magnesium supplements as per discretion of the local investigator and P-magnesium is repeated within 7-10 days.
7. If P-magnesium is < 0.5mmol/L despite maximal tolerated magnesium supplement treatment, patiromer is discontinued and p-magnesium is repeated within two days

In case of events 1-5 above, RAAS-blockade may be reinitiated at the previous dosage if and when kidney function is restored and/or P-potassium < 5.4mmol/L following discontinuation or dose reduction of the RAAS inhibitor.

The study is halted if at any point a significant higher number of the following events are observed in patiromer group compared to the control group:

1. Events with hyperkalaemia > 6.2mmol/L
2. Patients with eGFR < 15 mL/min/1.73 m<sup>2</sup> or requiring dialysis for > 3 months
3. Deaths
4. Admissions (except events due to hyperkalaemia, covered in point 1)
5. A combined endpoint of the four above

These outcomes will be evaluated by the PI after each such event using Fischer's exact test.

### **Study oversight and monitoring.**

The study is monitored by the GCP unit at Aarhus and Aalborg University Hospitals. It does not include an independent data monitoring committee due to the open label design, limited number of sites and continuous monitoring of significant safety outcomes as described above. Any systematic or serious risk to the participants will be immediately apparent to the PI and sponsor. The study may be audited by the Danish Medicines Agency. Safety reports are forwarded to the Danish Medicines Agency and The Central Denmark Region Committees on Health Research Ethics annually.

### **Patient and Public Involvement statement**

Participants were involved in changes to the design of the study. They preferred less transportation and fewer hospital visits. From their feedback, some visits were replaced by phone consultations and blood sampling prior to most visits was made possible at 28 local sites across the Central Denmark Region. Once the trial has been published, participants will be informed of the results via e-mail using the REDCap distribution tool.

## Current trial status

The first participant was included in the study late August 2020 and is planned to continue until March 2022. At the time of writing (August 2021), 56 participants have been included and 14 have been randomised to the treatment phase. Enrollment was halted from December 2020 due to the lockdown following COVID-19 in Denmark but was resumed in March 2021.

## ETHICS AND DISSEMINATION

The study protocol was initially approved by The Central Denmark Region Committees on Health Research Ethics (REFNO 1-10-72-110-20) on June 23<sup>rd</sup> 2020 with the latest version being approved on July 1<sup>st</sup> 2021 and by the Danish Medicines Agency on June 10<sup>th</sup> 2021. The research will be conducted in accordance with the Helsinki Declaration and Good Clinical Practice. All protocol amendments will be approved by the Ethics Committee and Danish Medicines Agency before implementation when required and all investigators will be notified directly.

A local investigator will obtain a written, informed consent from all participants prior to inclusion. The consent form follows the standards and template from the Danish National Committee on Health Research Ethics.

All principal investigators and sponsor will have access to the cleaned dataset.

Trial results, positive as well as negative, will be submitted for publication in peer reviewed, international journals and presented at conferences and meetings.

## DISCUSSION

This study investigates the feasibility of daily treatment with an established potassium-binding agent in moderate and severe CKD patients with albuminuria. It will examine if treatment enables increased RAAS-blockade and leads to a greater decline in albuminuria. Previous studies have shown that patiromer allows for the use of spironolactone in CKD patients with hyperkalaemia[49]; however, it is unknown if the approach leads to an effect on albuminuria in this distinct group of patients. The study aims to fill this gap in current knowledge.

The open label study design should closely mimic the clinical decision making and the delicate task of balancing hyperkalaemia and renoprotection. This will provide information on the practicability and potential benefits of such an approach in patients with hyperkaliemia otherwise barred from full pharmaceutical blockage of the RAAS-system. Of note, the study includes a one-year follow-up to examine potential complications to long-term treatment including non-adherence, hypotension, AKI and other adverse effects. Additional strengths of the study include the extensive list of outcomes and the RCT design. Furthermore, the unique and selective run-in phase only allows randomisation of patients that are proven to potentially benefit from treatment with a potassium binder, which should be in accordance with clinical practice. In addition, since all included interventions involves established and approved drugs, the road to implementation ought to be short.

1  
2  
3  
4 There are some potential limitations and challenges. First, the small sample size and one-year follow-up  
5 does not allow for evaluation of harder renal endpoints such as progression to end-stage renal disease or a  
6 50% reduction in eGFR. However, albuminuria is a widely accepted surrogate marker of disease progression  
7 in albuminuric CKD. In addition, it is closely correlated to the protective effects of RAAS-blockade. Second,  
8 the study is not powered to detect minor differences in the change in albuminuria; however, it will be able  
9 to identify a 1.5 times greater reduction in UACR. Third, the one-year follow-up may challenge patient  
10 adherence to treatment. Fourth, the open-label design may introduce selection bias in physicians' use of  
11 non-investigational drugs. Standard operating procedures on concomitant treatment, including instructions  
12 for the use of diuretics, are established to mitigate such bias. The open label design does provide some  
13 potential benefits, allowing for a setup that closely resembles clinical practice and for a more practical  
14 safety algorithm to prevent potentially life-threatening hyperkalaemia. The primary outcome is based on  
15 biochemical findings and thus, we believe that it is very unlikely that this is affected by the open label  
16 design.  
17  
18  
19

20 The power calculations are based on the number of randomised patients after the run-in phase. It is  
21 assumed that 30% of the included patient will not be eligible for randomisation; however, the accuracy of  
22 this number has not been established and thus, the number of actual randomised patients may be  
23 different. The extensive screening algorithm, which is based on results from blood samples in all 4  
24 outpatient clinics and the entire Aarhus University public admission area, will however ensure that all  
25 eligible candidates are invited to the study. This is particularly important as the number of patients with an  
26 eGFR between 25 and 60 mL/min/1.73m<sup>2</sup>, concomitant and significant albuminuria, and previous or current  
27 P-potassium >4.5mmol/L may be limited.  
28  
29  
30

31 The study is partly based on the assumption that adding MRA to ACE-I/ARB treatment in this subgroup of  
32 patients is beneficial if hyperkalaemia can be controlled, supported by the recent results of the FIDELIO-  
33 DKD trial [31]; however, the underlying principle is also applicable to patients in which maximal dosing of  
34 ACE-I or ARBs is barred by hyperkalaemia. If this study establishes the feasibility of such approach, it should  
35 pave the way for larger studies with hard endpoints to corroborate the use of potassium binders in patients  
36 currently excluded from maximal RAAS-inhibition.  
37  
38  
39  
40

## 41 ROLES AND RESPONSIBILITIES

42 **Authors' contributions:** HB conceived the study and had editorial rights on the protocol. FHM was first  
43 author of the protocol, primary investigator in Aarhus and implemented the study on all sites as the  
44 coordinating investigator. CDP held an advisory role in the writing of the protocol. All authors including JHC  
45 contributed to refinement of the study protocol including the design and approved the final manuscript.  
46  
47

### 48 **Sponsor and funder roles:**

49 HB (sponsor) conceived the study and the design hereof. Vifor Pharma has been allowed access to and  
50 commented on the protocol before funding the study, but had no decisive influence on the design. Vifor  
51 will be informed on the progression of the study and on SAEs relating to patiromer, but will not have any  
52 influence on the execution, the data analyses, the interpretation of data, or the decision to submit results.  
53  
54

55 **Lead investigators:** A lead investigator (senior nephrologist) will be identified at each site. The lead  
56 investigator is responsible for identification of potential study subjects, recruitment hereof, data collection  
57 and completion of CRFs, along with follow up of study patients and adherence to study protocol and  
58 investigators brochure. The lead investigator may appoint sub-investigators to act on his or her behalf.  
59  
60

## FUNDING

The work is supported by Vifor Pharma who delivers patiromer free of charge and has funded the project with a research grant. The project has also received funding from Aarhus University as a Research training supplement.

## Study administration, financial statement and conflicts of interest

Neither the study sponsor (HB), PI (FHM) nor any other investigators have any financial involvement with the primary funder (Vifor Pharma) or the primary study drug (patiromer). HB has previously participated in advisory boards and meetings hosted by Vifor Pharma. These have all been reported to the Danish Medicines Agency. The authors have no further conflicts of interest to declare.

## REGISTRATIONS

Registration: EudraCT: 2020-001595-15

Sponsor protocol code: 270389-010520

Protocol version 15, June 26<sup>th</sup> 2021

First approval from Ethics Committee (The Central Denmark Region Committees on Health Research Ethics): June 23<sup>rd</sup> 2020

First approval from the Danish Medicines Agency: June 4<sup>th</sup> 2020

## Figure 1: Flowchart of the trial design

UACR: Urine albumin/creatinine ratio, 24h ABPM: 24-hour ambulatory blood pressure monitoring, ECG: electrocardiogram, PWA: Pulse wave analysis, PWV: Pulse wave velocity, RAAS-blockade: Renin angiotensin aldosterone system blockade (losartan and/or spironolactone).



1  
2  
3  
4  
5  
6  
7  
8  
9  
10  
11  
12  
13  
14  
15  
16  
17  
18  
19  
20  
21  
22  
23  
24  
25  
26  
27  
28  
29  
30  
31  
32  
33  
34  
35  
36  
37  
38  
39  
40  
41  
42  
43  
44  
45  
46  
47  
48  
49  
50  
51  
52  
53  
54  
55  
56  
57  
58  
59  
60

## REFERENCES

- 1 Chen TK, Knicely DH, Grams ME. Chronic Kidney Disease Diagnosis and Management: A Review. *JAMA - J. Am. Med. Assoc.* 2019;**322**:1294–304. doi:10.1001/jama.2019.14745
- 2 Iseki K, Kinjo K, Iseki C, *et al.* Relationship between predicted creatinine clearance and proteinuria and the risk of developing ESRD in Okinawa, Japan. *Am J Kidney Dis* 2004;**44**:806–14. doi:10.1053/j.ajkd.2004.07.007
- 3 Brenner BM, Cooper ME, De Zeeuw D, *et al.* Effects of losartan on renal and cardiovascular outcomes in patients with type 2 diabetes and nephropathy. *N Engl J Med* 2001;**345**:861–9. doi:10.1056/NEJMoa011161
- 4 Lewis EJ, Hunsicker LG, Bain RP, *et al.* The Effect of Angiotensin-Converting-Enzyme Inhibition on Diabetic Nephropathy. *N Engl J Med* 1993;**329**:1456–62. doi:10.1056/NEJM19931113292004
- 5 Weinberg MS, Kaperonis N, Bakris GL. How high should an ACE inhibitor or angiotensin receptor blocker be dosed in patients with diabetic nephropathy? *Curr. Hypertens. Rep.* 2003;**5**:418–25. doi:10.1007/s11906-003-0088-8
- 6 Levey AS, Gansevoort RT, Coresh J, *et al.* Change in Albuminuria and GFR as End Points for Clinical Trials in Early Stages of CKD: A Scientific Workshop Sponsored by the National Kidney Foundation in Collaboration With the US Food and Drug Administration and European Medicines Agency. In: *American Journal of Kidney Diseases*. W.B. Saunders 2020. 84–104. doi:10.1053/j.ajkd.2019.06.009
- 7 Waijer SW, Gansevoort RT, Heerspink HJL. Change in albuminuria as a surrogate endpoint. *Curr Opin Nephrol Hypertens* 2019;**28**:519–26. doi:10.1097/MNH.0000000000000541
- 8 Balamuthusamy S, Srinivasan L, Verma M, *et al.* Renin angiotensin system blockade and cardiovascular outcomes in patients with chronic kidney disease and proteinuria: A meta-analysis. *Am. Heart J.* 2008;**155**:791–805. doi:10.1016/j.ahj.2008.01.031
- 9 Ruiz-Ortega M, Lorenzo O, Ruperez M, *et al.* ACE inhibitors and AT(1) receptor antagonists-beyond the haemodynamic effect. *Nephrol Dial Transplant* 2000;**15**:561–5. doi:10.1093/ndt/15.5.561
- 10 Ruiz-Ortega M, Lorenzo O, Suzuki Y, *et al.* Proinflammatory actions of angiotensins. *Curr. Opin. Nephrol. Hypertens.* 2001;**10**:321–9. doi:10.1097/00041552-200105000-00005
- 11 Zhuo JL. Monocyte chemoattractant protein-1: a key mediator of angiotensin II-induced target organ damage in hypertensive heart disease? *J Hypertens* 2004;**22**:451–4. doi:10.1097/01.hjh.0000098211.37783.e7
- 12 Lottermoser K, Vetter DR. Blood Pressure-Independent Atherogenic and Thromboembolic Mechanisms of the Renin-Angiotensin-Aldosterone System. 2001. www.kup.at/jcbc (accessed 17 Apr 2020).
- 13 Dandona P, Kumar V, Aljada A, *et al.* Angiotensin II receptor blocker valsartan suppresses reactive oxygen species generation in leukocytes, nuclear factor- $\kappa$ B, in mononuclear cells of normal subjects: Evidence of an antiinflammatory action. *J. Clin. Endocrinol. Metab.* 2003;**88**:4496–501. doi:10.1210/jc.2002-021836
- 14 Stenvinkel P, Ketteler M, Johnson RJ, *et al.* IL-10, IL-6, and TNF- $\alpha$ : Central factors in the altered cytokine network of uremia - The good, the bad, and the ugly. *Kidney Int* 2005;**67**:1216–33. doi:10.1111/j.1523-1755.2005.00200.x
- 15 Navalkar S, Parthasarathy S, Santanam N, *et al.* Irbesartan, an angiotensin type 1 receptor inhibitor,

- regulates markers of inflammation in patients with premature atherosclerosis. *J Am Coll Cardiol* 2001;**37**:440–4. doi:10.1016/S0735-1097(00)01138-4
- 16 Dahlöf B, Devereux RB, Kjeldsen SE, *et al.* Cardiovascular morbidity and mortality in the Losartan Intervention For Endpoint reduction in hypertension study (LIFE): A randomised trial against atenolol. *Lancet* 2002;**359**:995–1003. doi:10.1016/S0140-6736(02)08089-3
- 17 Malmqvist K, Kahan T, Edner M, *et al.* Regression of left ventricular hypertrophy in human hypertension with irbesartan. *J Hypertens* 2001;**19**:1167–76. doi:10.1097/00004872-200106000-00023
- 18 Peters CD, Kjaergaard KD, Jensen JD, *et al.* No significant effect of angiotensin II receptor blockade on intermediate cardiovascular end points in hemodialysis patients. *Kidney Int* 2014;**86**:625–37. doi:10.1038/ki.2014.69
- 19 Jankowich M, Choudhary G. Endothelin-1 levels and cardiovascular events. *Trends Cardiovasc. Med.* 2019. doi:10.1016/j.tcm.2019.01.007
- 20 Barton M. Reversal of proteinuric renal disease and the emerging role of endothelin. *Nat. Clin. Pract. Nephrol.* 2008;**4**:490–501. doi:10.1038/ncpneph0891
- 21 Barrera-Chimal J, Girerd S, Jaisser F. Mineralocorticoid receptor antagonists and kidney diseases: pathophysiological basis. *Kidney Int.* 2019;**96**:302–19. doi:10.1016/j.kint.2019.02.030
- 22 Gilbert KC, Brown NJ. Aldosterone and inflammation. *Curr Opin Endocrinol Diabetes Obes* 2010;**17**:199–204. doi:10.1097/MED.0b013e3283391989
- 23 Shavit L, Lifschitz MD, Epstein M. Aldosterone blockade and the mineralocorticoid receptor in the management of chronic kidney disease: Current concepts and emerging treatment paradigms. *Kidney Int.* 2012;**81**:955–68. doi:10.1038/ki.2011.505
- 24 Remuzzi G, Cattaneo D, Perico N. The aggravating mechanisms of aldosterone on kidney fibrosis. *J Am Soc Nephrol* 2008;**19**:1459–62. doi:10.1681/ASN.2007101079
- 25 Berl T, Katz FH, Henrich WL, *et al.* Role of aldosterone in the control of sodium excretion in patients with advanced chronic renal failure. *Kidney Int* 1978;**14**:228–35. doi:10.1038/ki.1978.114
- 26 Hene RJ, Boer P, Koomans HA, *et al.* Plasma aldosterone concentrations in chronic renal disease. *Kidney Int* 1982;**21**:98–101. doi:10.1038/ki.1982.14
- 27 Bomback AS, Klemmer PJ. The incidence and implications of aldosterone breakthrough. *Nat. Clin. Pract. Nephrol.* 2007;**3**:486–92. doi:10.1038/ncpneph0575
- 28 Alexandrou M-E, Papagianni A, Tsapas A, *et al.* Effects of mineralocorticoid receptor antagonists in proteinuric kidney disease. *J Hypertens* 2019;**37**:2307–24. doi:10.1097/HJH.0000000000002187
- 29 Currie G, Taylor AHM, Fujita T, *et al.* Effect of mineralocorticoid receptor antagonists on proteinuria and progression of chronic kidney disease: A systematic review and meta-analysis. *BMC Nephrol.* 2016;**17**. doi:10.1186/s12882-016-0337-0
- 30 Capelli I, Gasperoni L, Ruggeri M, *et al.* New mineralocorticoid receptor antagonists: update on their use in chronic kidney disease and heart failure. *J. Nephrol.* 2019. doi:10.1007/s40620-019-00600-7
- 31 Bakris GL, Agarwal R, Anker SD, *et al.* Effect of Finerenone on Chronic Kidney Disease Outcomes in Type 2 Diabetes. *N Engl J Med* 2020;**383**:2219–29. doi:10.1056/nejmoa2025845

1  
2  
3  
4  
5  
6  
7  
8  
9  
10  
11  
12  
13  
14  
15  
16  
17  
18  
19  
20  
21  
22  
23  
24  
25  
26  
27  
28  
29  
30  
31  
32  
33  
34  
35  
36  
37  
38  
39  
40  
41  
42  
43  
44  
45  
46  
47  
48  
49  
50  
51  
52  
53  
54  
55  
56  
57  
58  
59  
60

- 32 Weiss JN, Qu Z, Shivkumar K. Electrophysiology of hypokalemia and hyperkalemia. *Circ Arrhythmia Electrophysiol* 2017;**10**. doi:10.1161/CIRCEP.116.004667
- 33 Kovesdy CP. Management of hyperkalemia in chronic kidney disease. *Nat Rev Nephrol* 2014;**10**:653–62. doi:10.1038/nrneph.2014.168
- 34 Georgianos PI, Agarwal R. Revisiting RAAS blockade in CKD with newer potassium-binding drugs. *Kidney Int* 2018;**93**:325–34. doi:10.1016/j.kint.2017.08.038
- 35 Raebel MA. Hyperkalemia Associated with Use of Angiotensin-Converting Enzyme Inhibitors and Angiotensin Receptor Blockers. *Cardiovasc. Ther.* 2012;**30**. doi:10.1111/j.1755-5922.2010.00258.x
- 36 Kumar R, Kanev L, Woods SD, *et al.* Managing hyperkalemia in high-risk patients in long-term care. *Am J Manag Care* 2017;**23**:S27–36. <http://www.ncbi.nlm.nih.gov/pubmed/28978211> (accessed 1 Oct 2019).
- 37 Li L, Harrison SD, Cope MJ, *et al.* Mechanism of Action and Pharmacology of Patiomer, a Nonabsorbed Cross-Linked Polymer That Lowers Serum Potassium Concentration in Patients With Hyperkalemia. *J Cardiovasc Pharmacol Ther* 2016;**21**:456–65. doi:10.1177/1074248416629549
- 38 Bakris GL, Pitt B, Weir MR, *et al.* Effect of patiomer on serum potassium level in patients with hyperkalemia and diabetic kidney disease the AMETHYST-DN randomised clinical trial. *JAMA - J Am Med Assoc* 2015;**314**:151–61. doi:10.1001/jama.2015.7446
- 39 Weir MR, Bakris GL, Bushinsky DA, *et al.* Patiomer in patients with kidney disease and hyperkalemia receiving RAAS inhibitors. *N Engl J Med* 2015;**372**:211–21. doi:10.1056/NEJMoa1410853
- 40 Sutherland C, Braunhofer P, Vrouchou P, *et al.* A Cost-Utility Analysis Of Raasi Enabling-Patiomer In Patients With Hyperkalemia. *Value Heal* 2017;**20**:A490. doi:10.1016/j.jval.2017.08.519
- 41 Cupisti A, Kovesdy CP, D'Alessandro C, *et al.* Dietary Approach to Recurrent or Chronic Hyperkalemia in Patients with Decreased Kidney Function. *Nutrients* 2018;**10**. doi:10.3390/nu10030261
- 42 Belle G, Martin DC. Sample size as a function of coefficient of variation and ratio of means. *Am Stat* 1993;**47**:165–7. doi:10.1080/00031305.1993.10475968
- 43 Woodside J V., Draper J, Lloyd A, *et al.* Use of biomarkers to assess fruit and vegetable intake. In: *Proceedings of the Nutrition Society*. Cambridge University Press 2017. 308–15. doi:10.1017/S0029665117000325
- 44 Lins L, Carvalho FM. SF-36 total score as a single measure of health-related quality of life: Scoping review. *SAGE Open Med* 2016;**4**:205031211667172. doi:10.1177/2050312116671725
- 45 Wark PA, Hardie LJ, Frost GS, *et al.* Validity of an online 24-h recall tool (myfood24) for dietary assessment in population studies: Comparison with biomarkers and standard interviews. *BMC Med* 2018;**16**. doi:10.1186/s12916-018-1113-8
- 46 Naresh CN, Hayen A, Weening A, *et al.* Day-to-day variability in spot urine albumin-creatinine ratio. *Am J Kidney Dis* 2013;**62**:1095–101. doi:10.1053/j.ajkd.2013.06.016
- 47 Harris PA, Taylor R, Thielke R, *et al.* Research electronic data capture (REDCap)—A metadata-driven methodology and workflow process for providing translational research informatics support. *J Biomed Inform* 2009;**42**:377–81. doi:10.1016/j.jbi.2008.08.010

- 1  
2  
3  
4 48 Harris PA, Taylor R, Minor BL, *et al.* The REDCap consortium: Building an international community of  
5 software platform partners. *J. Biomed. Inform.* 2019;**95**. doi:10.1016/j.jbi.2019.103208  
6  
7 49 Agarwal R, Rossignol P, Romero A, *et al.* Patiromer versus placebo to enable spironolactone use in  
8 patients with resistant hypertension and chronic kidney disease (AMBER): a phase 2, randomised,  
9 double-blind, placebo-controlled trial. *Lancet (London, England)* Published Online First: 13  
10 September 2019. doi:10.1016/S0140-6736(19)32135-X  
11  
12  
13  
14  
15  
16  
17  
18  
19  
20  
21  
22  
23  
24  
25  
26  
27  
28  
29  
30  
31  
32  
33  
34  
35  
36  
37  
38  
39  
40  
41  
42  
43  
44  
45  
46  
47  
48  
49  
50  
51  
52  
53  
54  
55  
56  
57  
58  
59  
60

For peer review only

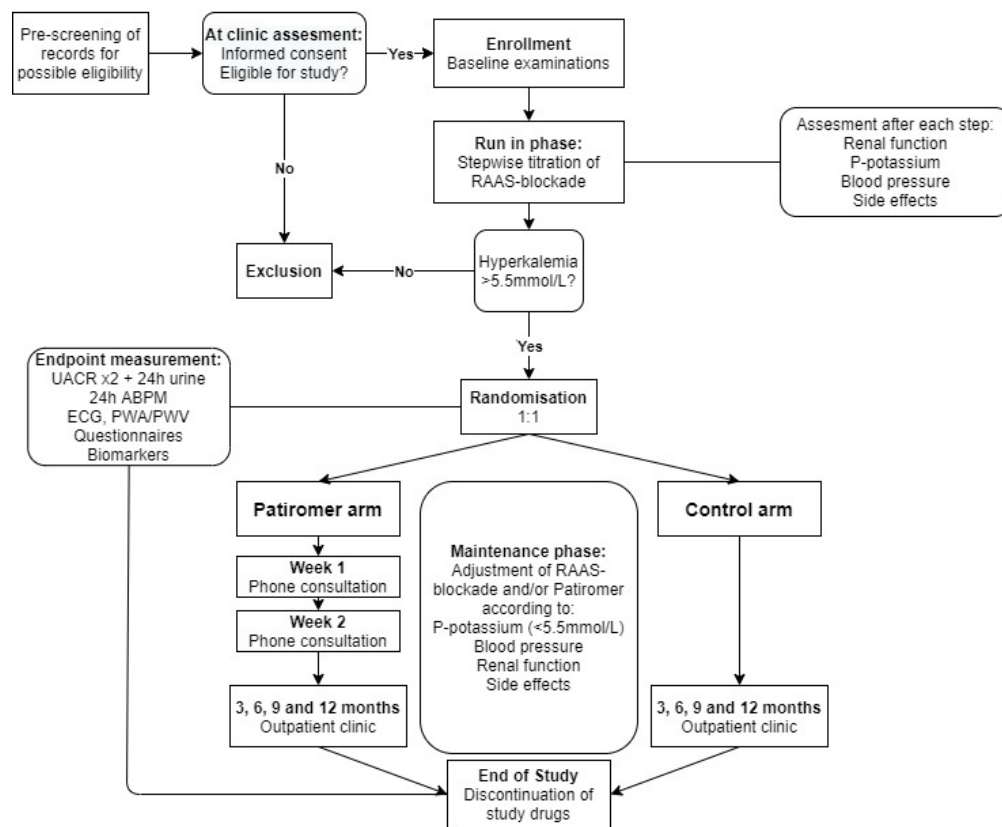

UACR: Urine albumin/creatinine ratio, 24h ABPM: 24-hour ambulatory blood pressure monitoring, ECG: electrocardiogram, PWA: Pulse wave analysis, PWV: Pulse wave velocity, RAAS-blockade: Renin angiotensin aldosterone system blockade (losartan and/or spironolactone).

259x218mm (72 x 72 DPI)

# Reporting checklist for protocol of a clinical trial.

Based on the SPIRIT guidelines.

## Instructions to authors

Complete this checklist by entering the page numbers from your manuscript where readers will find each of the items listed below.

Your article may not currently address all the items on the checklist. Please modify your text to include the missing information. If you are certain that an item does not apply, please write "n/a" and provide a short explanation.

Upload your completed checklist as an extra file when you submit to a journal.

In your methods section, say that you used the SPIRIT reporting guidelines, and cite them as:

Chan A-W, Tetzlaff JM, Gøtzsche PC, Altman DG, Mann H, Berlin J, Dickersin K, Hróbjartsson A, Schulz KF, Parulekar WR, Krleža-Jerić K, Laupacis A, Moher D. SPIRIT 2013 Explanation and Elaboration: Guidance for protocols of clinical trials. *BMJ*. 2013;346:e7586

|                                             |                     | Reporting Item                                                                                               | Page Number |
|---------------------------------------------|---------------------|--------------------------------------------------------------------------------------------------------------|-------------|
| <b>Administrative information</b>           |                     |                                                                                                              |             |
| Title                                       | <a href="#">#1</a>  | Descriptive title identifying the study design, population, interventions, and, if applicable, trial acronym | 1           |
| Trial registration                          | <a href="#">#2a</a> | Trial identifier and registry name. If not yet registered, name of intended registry                         | 2, 17       |
| Trial registration: data set                | <a href="#">#2b</a> | All items from the World Health Organization Trial Registration Data Set                                     | 1-17        |
| Protocol version                            | <a href="#">#3</a>  | Date and version identifier                                                                                  | 17          |
| Funding                                     | <a href="#">#4</a>  | Sources and types of financial, material, and other support                                                  | 16          |
| Roles and responsibilities: contributorship | <a href="#">#5a</a> | Names, affiliations, and roles of protocol contributors                                                      | 16          |

|    |                           |                     |                                                                      |    |
|----|---------------------------|---------------------|----------------------------------------------------------------------|----|
| 1  | Roles and                 | <a href="#">#5b</a> | Name and contact information for the trial sponsor                   | 16 |
| 2  | responsibilities:         |                     |                                                                      |    |
| 3  | sponsor contact           |                     |                                                                      |    |
| 4  | information               |                     |                                                                      |    |
| 5  |                           |                     |                                                                      |    |
| 6  |                           |                     |                                                                      |    |
| 7  |                           |                     |                                                                      |    |
| 8  | Roles and                 | <a href="#">#5c</a> | Role of study sponsor and funders, if any, in study design;          | 16 |
| 9  | responsibilities:         |                     | collection, management, analysis, and interpretation of data;        |    |
| 10 | sponsor and funder        |                     | writing of the report; and the decision to submit the report for     |    |
| 11 |                           |                     | publication, including whether they will have ultimate authority     |    |
| 12 |                           |                     | over any of these activities                                         |    |
| 13 |                           |                     |                                                                      |    |
| 14 |                           |                     |                                                                      |    |
| 15 |                           |                     |                                                                      |    |
| 16 | Roles and                 | <a href="#">#5d</a> | Composition, roles, and responsibilities of the coordinating centre, | 11 |
| 17 | responsibilities:         |                     | steering committee, endpoint adjudication committee, data            |    |
| 18 | committees                |                     | management team, and other individuals or groups overseeing the      |    |
| 19 |                           |                     | trial, if applicable (see Item 21a for data monitoring committee)    |    |
| 20 |                           |                     |                                                                      |    |
| 21 |                           |                     |                                                                      |    |
| 22 |                           |                     |                                                                      |    |
| 23 | <b>Introduction</b>       |                     |                                                                      |    |
| 24 |                           |                     |                                                                      |    |
| 25 | Background and            | <a href="#">#6a</a> | Description of research question and justification for undertaking   | 3  |
| 26 | rationale                 |                     | the trial, including summary of relevant studies (published and      |    |
| 27 |                           |                     | unpublished) examining benefits and harms for each intervention      |    |
| 28 |                           |                     |                                                                      |    |
| 29 |                           |                     |                                                                      |    |
| 30 | Background and            | <a href="#">#6b</a> | Explanation for choice of comparators                                | 3  |
| 31 | rationale: choice of      |                     |                                                                      |    |
| 32 | comparators               |                     |                                                                      |    |
| 33 |                           |                     |                                                                      |    |
| 34 |                           |                     |                                                                      |    |
| 35 |                           |                     |                                                                      |    |
| 36 | Objectives                | <a href="#">#7</a>  | Specific objectives or hypotheses                                    | 4  |
| 37 |                           |                     |                                                                      |    |
| 38 | Trial design              | <a href="#">#8</a>  | Description of trial design including type of trial (eg, parallel    | 4  |
| 39 |                           |                     | group, crossover, factorial, single group), allocation ratio, and    |    |
| 40 |                           |                     | framework (eg, superiority, equivalence, non-inferiority,            |    |
| 41 |                           |                     | exploratory)                                                         |    |
| 42 |                           |                     |                                                                      |    |
| 43 |                           |                     |                                                                      |    |
| 44 |                           |                     |                                                                      |    |
| 45 | <b>Methods:</b>           |                     |                                                                      |    |
| 46 | <b>Participants,</b>      |                     |                                                                      |    |
| 47 | <b>interventions, and</b> |                     |                                                                      |    |
| 48 | <b>outcomes</b>           |                     |                                                                      |    |
| 49 |                           |                     |                                                                      |    |
| 50 |                           |                     |                                                                      |    |
| 51 | Study setting             | <a href="#">#9</a>  | Description of study settings (eg, community clinic, academic        | 5  |
| 52 |                           |                     | hospital) and list of countries where data will be collected.        |    |
| 53 |                           |                     | Reference to where list of study sites can be obtained               |    |
| 54 |                           |                     |                                                                      |    |
| 55 |                           |                     |                                                                      |    |
| 56 |                           |                     |                                                                      |    |
| 57 | Eligibility criteria      | <a href="#">#10</a> | Inclusion and exclusion criteria for participants. If applicable,    | 5  |
| 58 |                           |                     | eligibility criteria for study centres and individuals who will      |    |
| 59 |                           |                     |                                                                      |    |
| 60 |                           |                     |                                                                      |    |

perform the interventions (eg, surgeons, psychotherapists)

|    |                      |                      |                                                                       |
|----|----------------------|----------------------|-----------------------------------------------------------------------|
| 1  |                      |                      |                                                                       |
| 2  |                      |                      |                                                                       |
| 3  | Interventions:       | <a href="#">#11a</a> | Interventions for each group with sufficient detail to allow          |
| 4  | description          |                      | replication, including how and when they will be administered         |
| 5  |                      |                      |                                                                       |
| 6  | Interventions:       | <a href="#">#11b</a> | Criteria for discontinuing or modifying allocated interventions for a |
| 7  | modifications        |                      | given trial participant (eg, drug dose change in response to harms,   |
| 8  |                      |                      | participant request, or improving / worsening disease)                |
| 9  |                      |                      |                                                                       |
| 10 |                      |                      |                                                                       |
| 11 | Interventions:       | <a href="#">#11c</a> | Strategies to improve adherence to intervention protocols, and any    |
| 12 | adherence            |                      | procedures for monitoring adherence (eg, drug tablet return;          |
| 13 |                      |                      | laboratory tests)                                                     |
| 14 |                      |                      |                                                                       |
| 15 |                      |                      |                                                                       |
| 16 |                      |                      |                                                                       |
| 17 | Interventions:       | <a href="#">#11d</a> | Relevant concomitant care and interventions that are permitted or     |
| 18 | concomitant care     |                      | prohibited during the trial                                           |
| 19 |                      |                      |                                                                       |
| 20 |                      |                      |                                                                       |
| 21 | Outcomes             | <a href="#">#12</a>  | Primary, secondary, and other outcomes, including the specific        |
| 22 |                      |                      | measurement variable (eg, systolic blood pressure), analysis metric   |
| 23 |                      |                      | (eg, change from baseline, final value, time to event), method of     |
| 24 |                      |                      | aggregation (eg, median, proportion), and time point for each         |
| 25 |                      |                      | outcome. Explanation of the clinical relevance of chosen efficacy     |
| 26 |                      |                      | and harm outcomes is strongly recommended                             |
| 27 |                      |                      |                                                                       |
| 28 |                      |                      |                                                                       |
| 29 |                      |                      |                                                                       |
| 30 |                      |                      |                                                                       |
| 31 | Participant timeline | <a href="#">#13</a>  | Time schedule of enrolment, interventions (including any run-ins      |
| 32 |                      |                      | and washouts), assessments, and visits for participants. A            |
| 33 |                      |                      | schematic diagram is highly recommended (see Figure)                  |
| 34 |                      |                      |                                                                       |
| 35 |                      |                      |                                                                       |
| 36 | Sample size          | <a href="#">#14</a>  | Estimated number of participants needed to achieve study              |
| 37 |                      |                      | objectives and how it was determined, including clinical and          |
| 38 |                      |                      | statistical assumptions supporting any sample size calculations       |
| 39 |                      |                      |                                                                       |
| 40 |                      |                      |                                                                       |
| 41 | Recruitment          | <a href="#">#15</a>  | Strategies for achieving adequate participant enrolment to reach      |
| 42 |                      |                      | target sample size                                                    |
| 43 |                      |                      |                                                                       |
| 44 |                      |                      |                                                                       |

## Methods: Assignment of interventions (for controlled trials)

|    |                      |                      |                                                                      |
|----|----------------------|----------------------|----------------------------------------------------------------------|
| 45 |                      |                      |                                                                      |
| 46 |                      |                      |                                                                      |
| 47 |                      |                      |                                                                      |
| 48 |                      |                      |                                                                      |
| 49 |                      |                      |                                                                      |
| 50 | Allocation: sequence | <a href="#">#16a</a> | Method of generating the allocation sequence (eg, computer-          |
| 51 | generation           |                      | generated random numbers), and list of any factors for               |
| 52 |                      |                      | stratification. To reduce predictability of a random sequence,       |
| 53 |                      |                      | details of any planned restriction (eg, blocking) should be provided |
| 54 |                      |                      | in a separate document that is unavailable to those who enrol        |
| 55 |                      |                      | participants or assign interventions                                 |
| 56 |                      |                      |                                                                      |
| 57 |                      |                      |                                                                      |
| 58 |                      |                      |                                                                      |
| 59 |                      |                      |                                                                      |
| 60 |                      |                      |                                                                      |



|    |                        |                      |                                                                       |     |
|----|------------------------|----------------------|-----------------------------------------------------------------------|-----|
| 1  | Allocation concealment | <a href="#">#16b</a> | Mechanism of implementing the allocation sequence (eg, central        | 6   |
| 2  | mechanism              |                      | telephone; sequentially numbered, opaque, sealed envelopes),          |     |
| 3  |                        |                      | describing any steps to conceal the sequence until interventions are  |     |
| 4  |                        |                      | assigned                                                              |     |
| 5  |                        |                      |                                                                       |     |
| 6  |                        |                      |                                                                       |     |
| 7  |                        |                      |                                                                       |     |
| 8  | Allocation:            | <a href="#">#16c</a> | Who will generate the allocation sequence, who will enrol             | 6   |
| 9  | implementation         |                      | participants, and who will assign participants to interventions       |     |
| 10 |                        |                      |                                                                       |     |
| 11 | Blinding (masking)     | <a href="#">#17a</a> | Who will be blinded after assignment to interventions (eg, trial      | 4   |
| 12 |                        |                      | participants, care providers, outcome assessors, data analysts), and  |     |
| 13 |                        |                      | how                                                                   |     |
| 14 |                        |                      |                                                                       |     |
| 15 |                        |                      |                                                                       |     |
| 16 |                        |                      |                                                                       |     |
| 17 | Blinding (masking):    | <a href="#">#17b</a> | If blinded, circumstances under which unblinding is permissible,      | N/A |
| 18 | emergency unblinding   |                      | and procedure for revealing a participant's allocated intervention    |     |
| 19 |                        |                      | during the trial                                                      |     |
| 20 |                        |                      |                                                                       |     |
| 21 |                        |                      |                                                                       |     |
| 22 | <b>Methods: Data</b>   |                      |                                                                       |     |
| 23 | <b>collection,</b>     |                      |                                                                       |     |
| 24 | <b>management, and</b> |                      |                                                                       |     |
| 25 | <b>analysis</b>        |                      |                                                                       |     |
| 26 |                        |                      |                                                                       |     |
| 27 |                        |                      |                                                                       |     |
| 28 |                        |                      |                                                                       |     |
| 29 | Data collection plan   | <a href="#">#18a</a> | Plans for assessment and collection of outcome, baseline, and other   | 8   |
| 30 |                        |                      | trial data, including any related processes to promote data quality   |     |
| 31 |                        |                      | (eg, duplicate measurements, training of assessors) and a             |     |
| 32 |                        |                      | description of study instruments (eg, questionnaires, laboratory      |     |
| 33 |                        |                      | tests) along with their reliability and validity, if known. Reference |     |
| 34 |                        |                      | to where data collection forms can be found, if not in the protocol   |     |
| 35 |                        |                      |                                                                       |     |
| 36 |                        |                      |                                                                       |     |
| 37 |                        |                      |                                                                       |     |
| 38 |                        |                      |                                                                       |     |
| 39 | Data collection plan:  | <a href="#">#18b</a> | Plans to promote participant retention and complete follow-up,        | 10  |
| 40 | retention              |                      | including list of any outcome data to be collected for participants   |     |
| 41 |                        |                      | who discontinue or deviate from intervention protocols                |     |
| 42 |                        |                      |                                                                       |     |
| 43 |                        |                      |                                                                       |     |
| 44 | Data management        | <a href="#">#19</a>  | Plans for data entry, coding, security, and storage, including any    | 10  |
| 45 |                        |                      | related processes to promote data quality (eg, double data entry;     |     |
| 46 |                        |                      | range checks for data values). Reference to where details of data     |     |
| 47 |                        |                      | management procedures can be found, if not in the protocol            |     |
| 48 |                        |                      |                                                                       |     |
| 49 |                        |                      |                                                                       |     |
| 50 |                        |                      |                                                                       |     |
| 51 | Statistics: outcomes   | <a href="#">#20a</a> | Statistical methods for analysing primary and secondary outcomes.     | 10  |
| 52 |                        |                      | Reference to where other details of the statistical analysis plan can |     |
| 53 |                        |                      | be found, if not in the protocol                                      |     |
| 54 |                        |                      |                                                                       |     |
| 55 |                        |                      |                                                                       |     |
| 56 | Statistics: additional | <a href="#">#20b</a> | Methods for any additional analyses (eg, subgroup and adjusted        | 10  |
| 57 | analyses               |                      | analyses)                                                             |     |
| 58 |                        |                      |                                                                       |     |
| 59 |                        |                      |                                                                       |     |
| 60 |                        |                      |                                                                       |     |

|    |                            |                      |                                                                         |     |
|----|----------------------------|----------------------|-------------------------------------------------------------------------|-----|
| 1  | Statistics: analysis       | <a href="#">#20c</a> | Definition of analysis population relating to protocol non-             | 10  |
| 2  | population and missing     |                      | adherence (eg, as randomised analysis), and any statistical methods     |     |
| 3  | data                       |                      | to handle missing data (eg, multiple imputation)                        |     |
| 4  |                            |                      |                                                                         |     |
| 5  |                            |                      |                                                                         |     |
| 6  | <b>Methods: Monitoring</b> |                      |                                                                         |     |
| 7  |                            |                      |                                                                         |     |
| 8  | Data monitoring:           | <a href="#">#21a</a> | Composition of data monitoring committee (DMC); summary of its          | 11  |
| 9  | formal committee           |                      | role and reporting structure; statement of whether it is independent    |     |
| 10 |                            |                      | from the sponsor and competing interests; and reference to where        |     |
| 11 |                            |                      | further details about its charter can be found, if not in the protocol. |     |
| 12 |                            |                      | Alternatively, an explanation of why a DMC is not needed                |     |
| 13 |                            |                      |                                                                         |     |
| 14 | Data monitoring:           | <a href="#">#21b</a> | Description of any interim analyses and stopping guidelines,            | 11  |
| 15 | interim analysis           |                      | including who will have access to these interim results and make        |     |
| 16 |                            |                      | the final decision to terminate the trial                               |     |
| 17 |                            |                      |                                                                         |     |
| 18 |                            |                      |                                                                         |     |
| 19 |                            |                      |                                                                         |     |
| 20 |                            |                      |                                                                         |     |
| 21 |                            |                      |                                                                         |     |
| 22 | Harms                      | <a href="#">#22</a>  | Plans for collecting, assessing, reporting, and managing solicited      | 10  |
| 23 |                            |                      | and spontaneously reported adverse events and other unintended          |     |
| 24 |                            |                      | effects of trial interventions or trial conduct                         |     |
| 25 |                            |                      |                                                                         |     |
| 26 |                            |                      |                                                                         |     |
| 27 | Auditing                   | <a href="#">#23</a>  | Frequency and procedures for auditing trial conduct, if any, and        | 11  |
| 28 |                            |                      | whether the process will be independent from investigators and the      |     |
| 29 |                            |                      | sponsor                                                                 |     |
| 30 |                            |                      |                                                                         |     |
| 31 |                            |                      |                                                                         |     |
| 32 |                            |                      |                                                                         |     |
| 33 | <b>Ethics and</b>          |                      |                                                                         |     |
| 34 | <b>dissemination</b>       |                      |                                                                         |     |
| 35 |                            |                      |                                                                         |     |
| 36 | Research ethics            | <a href="#">#24</a>  | Plans for seeking research ethics committee / institutional review      | 12  |
| 37 | approval                   |                      | board (REC / IRB) approval                                              |     |
| 38 |                            |                      |                                                                         |     |
| 39 |                            |                      |                                                                         |     |
| 40 | Protocol amendments        | <a href="#">#25</a>  | Plans for communicating important protocol modifications (eg,           | 12  |
| 41 |                            |                      | changes to eligibility criteria, outcomes, analyses) to relevant        |     |
| 42 |                            |                      | parties (eg, investigators, REC / IRBs, trial participants, trial       |     |
| 43 |                            |                      | registries, journals, regulators)                                       |     |
| 44 |                            |                      |                                                                         |     |
| 45 |                            |                      |                                                                         |     |
| 46 |                            |                      |                                                                         |     |
| 47 | Consent or assent          | <a href="#">#26a</a> | Who will obtain informed consent or assent from potential trial         | 12  |
| 48 |                            |                      | participants or authorised surrogates, and how (see Item 32)            |     |
| 49 |                            |                      |                                                                         |     |
| 50 |                            |                      |                                                                         |     |
| 51 | Consent or assent:         | <a href="#">#26b</a> | Additional consent provisions for collection and use of participant     | N/A |
| 52 | ancillary studies          |                      | data and biological specimens in ancillary studies, if applicable       |     |
| 53 |                            |                      |                                                                         |     |
| 54 |                            |                      |                                                                         |     |
| 55 | Confidentiality            | <a href="#">#27</a>  | How personal information about potential and enrolled participants      | 10  |
| 56 |                            |                      | will be collected, shared, and maintained in order to protect           |     |
| 57 |                            |                      | confidentiality before, during, and after the trial                     |     |
| 58 |                            |                      |                                                                         |     |
| 59 |                            |                      |                                                                         |     |
| 60 |                            |                      |                                                                         |     |

|    |                                             |                      |                                                                                                                                                                                                                                                                                     |     |
|----|---------------------------------------------|----------------------|-------------------------------------------------------------------------------------------------------------------------------------------------------------------------------------------------------------------------------------------------------------------------------------|-----|
| 1  | Declaration of interests                    | <a href="#">#28</a>  | Financial and other competing interests for principal investigators for the overall trial and each study site                                                                                                                                                                       | 16  |
| 2  |                                             |                      |                                                                                                                                                                                                                                                                                     |     |
| 3  |                                             |                      |                                                                                                                                                                                                                                                                                     |     |
| 4  |                                             |                      |                                                                                                                                                                                                                                                                                     |     |
| 5  | Data access                                 | <a href="#">#29</a>  | Statement of who will have access to the final trial dataset, and disclosure of contractual agreements that limit such access for investigators                                                                                                                                     | 12  |
| 6  |                                             |                      |                                                                                                                                                                                                                                                                                     |     |
| 7  |                                             |                      |                                                                                                                                                                                                                                                                                     |     |
| 8  |                                             |                      |                                                                                                                                                                                                                                                                                     |     |
| 9  |                                             |                      |                                                                                                                                                                                                                                                                                     |     |
| 10 | Ancillary and post trial care               | <a href="#">#30</a>  | Provisions, if any, for ancillary and post-trial care, and for compensation to those who suffer harm from trial participation                                                                                                                                                       | N/A |
| 11 |                                             |                      |                                                                                                                                                                                                                                                                                     |     |
| 12 |                                             |                      |                                                                                                                                                                                                                                                                                     |     |
| 13 |                                             |                      |                                                                                                                                                                                                                                                                                     |     |
| 14 | Dissemination policy: trial results         | <a href="#">#31a</a> | Plans for investigators and sponsor to communicate trial results to participants, healthcare professionals, the public, and other relevant groups (eg, via publication, reporting in results databases, or other data sharing arrangements), including any publication restrictions | 12  |
| 15 |                                             |                      |                                                                                                                                                                                                                                                                                     |     |
| 16 |                                             |                      |                                                                                                                                                                                                                                                                                     |     |
| 17 |                                             |                      |                                                                                                                                                                                                                                                                                     |     |
| 18 |                                             |                      |                                                                                                                                                                                                                                                                                     |     |
| 19 |                                             |                      |                                                                                                                                                                                                                                                                                     |     |
| 20 |                                             |                      |                                                                                                                                                                                                                                                                                     |     |
| 21 | Dissemination policy: authorship            | <a href="#">#31b</a> | Authorship eligibility guidelines and any intended use of professional writers                                                                                                                                                                                                      | 16  |
| 22 |                                             |                      |                                                                                                                                                                                                                                                                                     |     |
| 23 |                                             |                      |                                                                                                                                                                                                                                                                                     |     |
| 24 |                                             |                      |                                                                                                                                                                                                                                                                                     |     |
| 25 | Dissemination policy: reproducible research | <a href="#">#31c</a> | Plans, if any, for granting public access to the full protocol, participant-level dataset, and statistical code                                                                                                                                                                     | N/A |
| 26 |                                             |                      |                                                                                                                                                                                                                                                                                     |     |
| 27 |                                             |                      |                                                                                                                                                                                                                                                                                     |     |
| 28 | <b>Appendices</b>                           |                      |                                                                                                                                                                                                                                                                                     |     |
| 29 |                                             |                      |                                                                                                                                                                                                                                                                                     |     |
| 30 |                                             |                      |                                                                                                                                                                                                                                                                                     |     |
| 31 | Informed consent materials                  | <a href="#">#32</a>  | Model consent form and other related documentation given to participants and authorised surrogates                                                                                                                                                                                  | 18  |
| 32 |                                             |                      |                                                                                                                                                                                                                                                                                     |     |
| 33 |                                             |                      |                                                                                                                                                                                                                                                                                     |     |
| 34 |                                             |                      |                                                                                                                                                                                                                                                                                     |     |
| 35 | Biological specimens                        | <a href="#">#33</a>  | Plans for collection, laboratory evaluation, and storage of biological specimens for genetic or molecular analysis in the current trial and for future use in ancillary studies, if applicable                                                                                      | N/A |
| 36 |                                             |                      |                                                                                                                                                                                                                                                                                     |     |
| 37 |                                             |                      |                                                                                                                                                                                                                                                                                     |     |
| 38 |                                             |                      |                                                                                                                                                                                                                                                                                     |     |
| 39 |                                             |                      |                                                                                                                                                                                                                                                                                     |     |

40 The SPIRIT Explanation and Elaboration paper is distributed under the terms of the Creative Commons  
 41 Attribution License CC-BY-NC. This checklist was completed on 17. September 2021 using  
 42 <https://www.goodreports.org/>, a tool made by the [EQUATOR Network](#) in collaboration with [Penelope.ai](#)  
 43  
 44  
 45  
 46  
 47  
 48  
 49  
 50  
 51  
 52  
 53  
 54  
 55  
 56  
 57  
 58  
 59

# BMJ Open

## Can Patiromer allow for intensified Renin Angiotensin Aldosterone System Blockade with Losartan and Spironolactone leading to decreased albuminuria in patients with Chronic Kidney Disease, albuminuria and hyperkalaemia? An open-label randomised controlled trial - MorphCKD

|                                 |                                                                                                                                                                                                                                                                                                                                                                                                                                                                                       |
|---------------------------------|---------------------------------------------------------------------------------------------------------------------------------------------------------------------------------------------------------------------------------------------------------------------------------------------------------------------------------------------------------------------------------------------------------------------------------------------------------------------------------------|
| Journal:                        | <i>BMJ Open</i>                                                                                                                                                                                                                                                                                                                                                                                                                                                                       |
| Manuscript ID                   | bmjopen-2021-057503.R1                                                                                                                                                                                                                                                                                                                                                                                                                                                                |
| Article Type:                   | Protocol                                                                                                                                                                                                                                                                                                                                                                                                                                                                              |
| Date Submitted by the Author:   | 25-Jan-2022                                                                                                                                                                                                                                                                                                                                                                                                                                                                           |
| Complete List of Authors:       | Mårup, Frederik; Aarhus University, Dept. of Biomedicine; Aarhus University Hospital, Dept. of Renal Medicine<br>Peters, Christian; Aarhus University, Dept. of Clinical Medicine; Aarhus University Hospital, Dept. of Renal Medicine<br>Christensen, Jeppe; Aalborg University Hospital, Department of Nephrology; Aalborg University, Department of Clinical Medicine<br>Birn, Henrik; Aarhus University, Dept. of Biomedicine; Aarhus University Hospital, Dep. of Renal Medicine |
| <b>Primary Subject Heading</b>: | Renal medicine                                                                                                                                                                                                                                                                                                                                                                                                                                                                        |
| Secondary Subject Heading:      | Renal medicine                                                                                                                                                                                                                                                                                                                                                                                                                                                                        |
| Keywords:                       | Chronic renal failure < NEPHROLOGY, Adult nephrology < NEPHROLOGY, Diabetic nephropathy & vascular disease < DIABETES & ENDOCRINOLOGY, Nephrology < INTERNAL MEDICINE                                                                                                                                                                                                                                                                                                                 |
|                                 |                                                                                                                                                                                                                                                                                                                                                                                                                                                                                       |

SCHOLARONE™  
Manuscripts

**TITLE:** Can Patiromer allow for intensified Renin Angiotensin Aldosterone System blockade with Losartan and Spironolactone leading to decreased albuminuria in patients with Chronic Kidney Disease, albuminuria and hyperkalaemia? An open-label randomised controlled trial - MorphCKD

#### AUTHORS

Frederik Husum Mårup (FHM), MD, Department of Renal Medicine, Aarhus University Hospital, Palle Juul-Jensens Boulevard 99, 8200 Aarhus N, Denmark, [fremaa@rm.dk](mailto:fremaa@rm.dk), phone: +45 2148 8731

Christian Daugaard Peters (CDP), MD, Department of Renal Medicine, Aarhus University Hospital, Palle Juul-Jensens Boulevard 99, 8200 Aarhus N, Denmark, [chipte@rm.dk](mailto:chipte@rm.dk)

Jeppe Hagstrup Christensen (JHC), MD, DMSc Professor, Department of Nephrology, Aalborg University Hospital, Mølleparkvej 4, 9000 Aalborg, Denmark, [jeppe.hagstrup.christensen@rn.dk](mailto:jeppe.hagstrup.christensen@rn.dk)

Henrik Birn (HB), MD, DMSc, PhD, Professor, Department of Renal Medicine, Aarhus University Hospital, Palle Juul-Jensens Boulevard 99, 8200 Aarhus N, Denmark, [hb@biomed.au.dk](mailto:hb@biomed.au.dk), phone: +45 6171 7870, Department of Biomedicine, Aarhus University, Wilhelm Meyer Allé 3, 8000 Aarhus C

Corresponding Author: FHM

Primary Sponsor: HB

Principal Investigator (PI): FHM

Contact for public queries: Department of Renal Medicine, Aarhus University Hospital

Contact for Scientific Queries: FHM

Word Count: 4877

#### KEYWORDS

Patiromer

Renal Insufficiency, Chronic

Renin-Angiotensin-Aldosterone System

Albuminuria

Hyperkalaemia

Mineralocorticoid Receptor Antagonists

Angiotensin Receptor Antagonists

## ABSTRACT

### INTRODUCTION

Chronic Kidney Disease (CKD) is associated with significantly increased morbidity and mortality. No specific treatment of the underlying condition is available for the majority of patients, but ACE-inhibitors (ACE-I) and angiotensin II-receptor blockers (ARB) slows progression in albuminuric CKD. Adding a mineralocorticoid receptor-antagonist (MRA) like spironolactone has an additive effect. However, Renin-angiotensin-aldosterone system (RAAS)-blockade increases the risk of hyperkalaemia which is exacerbated by the presence of CKD. Thus, hyperkalaemia may prevent optimal use of RAAS-blockade in some patients.

This project hypothesizes that adding a potassium binder (patiromer) allows for improved RAAS-blockade including the use of MRA, thereby reducing albuminuria in patients with albuminuric CKD where full treatment is limited by hyperkalemia.

If successful, the study may lead to improved treatment of this subgroup of CKD patients. Furthermore, the study will examine the feasibility of potassium binders in patients with CKD.

### METHODS AND ANALYSIS

An open label, randomised controlled trial including 140 patients with eGFR 25-60 mL/min/1.73m<sup>2</sup>, a urinary albumin/creatinine ratio (UACR) > 500 mg/g (or 200mg/g if diabetes mellitus) and a current or two previous plasma-potassium >4.5mmol/L. Patients who develop hyperkalemia >5.5 mmol/L during a run-in phase, in which RAAS-blockade is intensified with the possible addition of spironolactone, are randomised to 12-month treatment with maximal tolerated ACE-I/ARB and spironolactone with or without patiromer.

The primary endpoint is the difference in UACR measured at randomisation and 12 months compared between the two groups. Secondary endpoints include CKD progression, episodes of hyperkalaemia, blood pressure, eGFR, markers of cardiovascular disease, diet and quality of life.

### ETHICS AND DISSEMINATION

This study is approved by The Central Denmark Region Committees on Health Research Ethics (REFNO 1-10-72-110-20) and is registered in the EudraCT database (REFNO 2020-001595-15). Results will be presented in peer-reviewed journals, at meetings and at international conferences.

## ARTICLE SUMMARY

### STRENGTHS AND LIMITATIONS OF THIS STUDY

- This study uses a robust randomised controlled design, investigating if patiromer, through increased RAAS-blockade, can reduce albuminuria in patients with CKD and hyperkalaemia.
- The selective run-in phase only allows randomisation of patients where RAAS-blockade is proven to be limited by hyperkalaemia.
- A one-year follow-up will examine long-term tolerability of patiromer in CKD patients, testing if such a treatment regime is feasible.
- The limited sample size and one-year follow-up that does not allow for evaluation of 'hard' endpoints such as time to renal death or decrease in eGFR

## INTRODUCTION

Chronic kidney disease (CKD) is associated with substantial comorbidity and mortality[1]. No curative treatment is currently available for the majority of patients, and current interventions aim to halt or slow the natural progression of the disease. Albuminuria is a well-established predictor of end stage renal disease (ESRD). The risk of progressing to ESRD is up to 75 times higher among CKD patients with significant albuminuria compared to patients without albuminuria[2]. Treatment with inhibitors of the renin-angiotensin-aldosterone system (RAAS) such as angiotensin-converting enzyme inhibitors (ACE-Is) or angiotensin II receptor blockers (ARBs) reduce albuminuria in a dose-dependent manner[3]. Furthermore, treatment slows CKD progression in both diabetic and non-diabetic CKD[4,5]. RAAS-blockade, in particular the use of ACE-I or ARB, is considered first-line treatment in patients with CKD and albuminuria. Evidence suggests that the change in albuminuria correlates with the protection provided and therefore serves as a surrogate marker of disease progression[6,7]. Other studies have shown that reducing albuminuria in CKD patients lowers the cardiovascular risk[8–10]. Cardiovascular risk can be assessed from left ventricular hypertrophy, arterial stiffness (pulse wave velocity (PWV) and central BP) and blood biomarkers such as endothelin-1, NT-proBNP and Tnl[11–15].

Aldosterone is a regulator of blood pressure through fluid and electrolyte homeostasis. Evidence strongly support an additional, direct pathophysiological role for aldosterone in the development of kidney and cardiovascular disease. Mineralocorticoid receptor (MR) activation induces inflammation, oxidative stress and fibrosis[16,17] and leads to glomerulosclerosis and cardiac fibrosis [18,19]. This increases the risk of kidney function decline, albuminuria and cardiovascular disease. Blood aldosterone levels increase as estimated glomerular filtration rate (eGFR) deteriorates, and CKD is considered a state of relative hyperaldosteronism [20,21]. RAAS blockade using ARB/ACE-I insufficiently lowers the aldosterone level, and plasma concentration typically rises after 6-12 months of treatment; a phenomenon known as aldosterone escape [22]. MR-antagonists (MRAs) such as spironolactone or eplerenone alone or in combination with ACE-I/ARB reduces albuminuria by 25-40%[23,24]. A large number of studies have suggested renoprotective benefits of treatment with MRA in CKD with persistent albuminuria. This notion was emphasized by the recent FIDELIO-DKD trial. The trial found that the addition of the MRA finerenone to ACE-I/ARB treatment in patients with CKD, type 2 diabetes and albuminuria significantly reduced the risk of renal outcomes and cardiovascular risk[25].

Despite inherent benefits, RAAS blockade may be hampered by fear of hyperkalaemia. Severe hyperkalaemia may cause life threatening cardiac arrhythmias[26]. CKD results in a reduced ability to excrete potassium and patients are at significant risk of hyperkalaemia[27,28]. Treatment with ACE-Is or ARBs as well as MRAs further inhibits renal potassium excretion, augmenting the risk of hyperkalaemia[29,30]. Thus, high potassium levels often limit the optimal use of RAAS blockade in many CKD patients[28]. Novel third generation nonsteroidal selective MRAs such as finerenone has a lower risk of causing hyperkalaemia compared to older generation MRAs, but the number of patients discontinuing treatment due to hyperkalaemia is still 2.5-fold higher compared to placebo[25]. Other ongoing clinical trials evaluating the effect of ACE-I or ARB combined with MRAs in CKD exclude patients with hyperkalaemia[16]. Thus, CKD patients with hyperkalaemia may be barred from the potential benefits of complete RAAS blockade including MRA.

In recent years, novel potassium-binding agents have been introduced. These include patiromer (Veltassa), a non-absorbable sodium-free powder for oral use, which binds potassium in the gastrointestinal tract, thereby increasing fecal excretion and lowering plasma (P) potassium[28]. Patiromer significantly lowers P-potassium in patients with CKD[31,32]. Several studies have proposed the use of patiromer to allow for

1  
2  
3  
4 increased RAAS blockade in patients with hyperkalaemia, CKD and suboptimal RAAS blockade  
5 treatment.[33]. Hyperkalaemia may be addressed through dietary restrictions, but these have limited  
6 effect,a profound impact on patient’s lifestyle and freedom and limit the intake of healthy fresh fruits and  
7 vegetables[34].  
8  
9

## 10 11 **Aims and Hypotheses**

12  
13 This trial aims to establish if the use of a potassium binding agent (patiomer) in patients with moderate or  
14 advanced CKD (eGFR 25-60 mL/min/1.73m<sup>2</sup>) leads to a reduction in albuminuria by the concomitant  
15 intensified use of RAAS-inhibitors (losartan and/or spironolactone). In secondary analyses, it will examine  
16 the effects of this approach on markers of cardiovascular function, dietary habits (including fruit and  
17 vegetable intake) and quality-of-life as well as the potential risks; monitoring blood pressure, episodes of  
18 hyperkalaemia and renal function.  
19

20  
21 Thus, the study will address the hypotheses that treatment with patiomer and intensified RAAS-blockade  
22 in patients with eGFR 25-60mL/min, albuminuria and a tendency of high potassium levels leads to:

- 23 1. A significant reduction in albuminuria when compared to patients in maximal RAAS-blockade as  
24 allowed by their P-potassium levels without patiomer
- 25 2. A significant reduction in albuminuria during treatment
- 26 3. A reduced PWV and left ventricular mass (LVM) along with improvement in blood biomarkers of  
27 cardiovascular function
- 28 4. An increased intake of healthy foods and higher quality of life  
29  
30  
31

## 32 **METHODS AND ANALYSIS**

33  
34 The MorphCKD study is an investigator-initiated, multicenter, open label, parallel group, superiority  
35 randomised controlled trial (RCT). Randomisation is performed as a block randomisation with 1:1  
36 allocation.  
37

38  
39 The study will include patients from the outpatient clinics at the renal departments in Aarhus, Aalborg,  
40 Holstebro and Viborg, Denmark. The primary site, Aarhus, will also include patients from the diabetes  
41 outpatient clinic and within the hospital public admission area (see under “recruitment”).  
42

43  
44 The study is divided into a run-in phase of 2-8 weeks followed by randomisation to a treatment phase  
45 involving 52 weeks of treatment with or without patiomer (see figure 1). The run-in phase will determine if  
46 maximized RAAS-blockade, including treatment with an MRA, leads to clinically significant hyperkalaemia  
47 (>5.5mmol/L) despite dietary counselling, thereby identifying the patients that may benefit from treatment  
48 with patiomer who qualify for randomisation to the treatment phase.  
49  
50

## 51 **FIGURE1 Flowchart of the trial design**

### 52 **Participants**

53  
54 A total of 140 patients fulfilling the eligibility criteria below will be included.

55  
56 Inclusion criteria:

- 57 1. Age 18-80  
58  
59  
60



2. eGFR 25-60 mL/min/1.73m<sup>2</sup>
3. Current P-potassium >4.5mmol/L or P-potassium >4.5mmol/L twice within 24 months
4. Urine albumin-creatinine ratio (UACR) >500mg/g or 200mg/g and diabetes

A lower UACR threshold for patients with diabetes is based on international guidelines suggesting a more aggressive approach when treating albuminuria in this group of patients[35], in which the renoprotective effects of treating lower levels of albuminuria is well documented[36].

Exclusion criteria:

1. Known allergies to both ACE-I and losartan or spironolactone or patiromer
2. A history of kidney transplantation or active on the waiting list
3. ESRD (defined as the need for dialysis or kidney transplantation)
4. Any renal disease requiring or being expected to require specific immunosuppressive therapy for the duration of the trial
5. Pregnancy or inability to use contraception
6. Regular need for trimethoprim or NSAIDs
7. Current treatment with aliskiren
8. Disseminated cancer disease
9. Addison's disease
10. HF defined as ejection fraction < 40% or active treatment at a HF clinic or similar
11. Porphyrria
12. Severe constipation with a regular use of laxatives or previous recurrent ileus
13. Fructose/galactose-intolerance
14. Severe liver insufficiency (Child-Pugh Score B-C)
15. Clinically significant severe renal artery stenosis
16. Investigator's evaluation that participation in the trial may cause serious harm to the patient (e.g. previous severe acute kidney injury (AKI) in relation to RAAS-blockade)
17. Initiation of an SGLT2-inhibitor within 30 days prior to inclusion

### Interventions and randomisation

Dietary counselling to limit potassium intake is provided at inclusion. Patients not treated with ACE-I/ARB at inclusion will commence losartan 50mg/day for the run-in phase (step 1 below). Patients already treated with ACE-I/ARB will continue this treatment at the current dose with the addition of an MRA (starting at step 3 below). Based on tolerability, RAAS-blockade is increased in four steps:

1. Losartan 50mg/day
2. Losartan 100mg/day
3. Losartan 100mg/day or current ACE-I/ARB + spironolactone 25mg/day
4. Losartan 100mg/day or current ACE-I/ARB + spironolactone 50mg/day

Blood samples and home BP monitoring will be performed 1-2 weeks after each dose change and the patient is contacted by phone to record home BP and to inform about blood results. Tolerability is evaluated by P-potassium, creatinine, BP and side effects. The dose of losartan or spironolactone is reduced to the previous step and the patient proceeds to randomisation if P-potassium is >5.5mmol/L.

Patients that reach step four without significant hyperkalaemia are excluded from the study.

1  
2  
3  
4 Patients completing the run-in phase with an episode of significant hyperkalaemia ( $>5.5\text{mmol/L}$ ), a UACR  $>300\text{mg/g}$  or  $150\text{mg/g}$  and diabetes, a most recent P-potassium  $>4.0\text{mmol/L}$  and no other contraindications (e.g. AKI) to continued and increased RAAS-blockade are randomised to open-label treatment in one of two regimes:

- 5  
6  
7  
8  
9  
10 1. Patiromer with stepwise dose-increase/-decrease with increased RAAS-blockade in addition to standard clinical care and dietary counselling. Patiromer will be dosed based on P-potassium and tolerability until maximal RAAS-blockade with P-potassium  $\leq 5.5\text{mmol/L}$ .
- 11  
12  
13  
14  
15 2. No patiromer (control group) with standard clinical care, dietary counselling and maximal RAAS-blockade with P-potassium  $\leq 5.5\text{mmol/L}$

16  
17  
18  
19  
20  
21  
22  
23  
24  
25  
26  
27  
28  
29  
30  
31  
32  
33  
34  
35  
36  
37  
38  
39  
40  
41  
42  
43  
44  
45  
46  
47  
48  
49  
50  
51  
52  
53  
54  
55  
56  
57  
58  
59  
60  
The lower threshold for albuminuria at randomisation compared to baseline is used to allow for some reduction of albuminuria resulting from the increase in RAAS-blockade during the run-in phase. Permuted block randomisation with random varying block sizes of 2, 4 and 6 is used to allocate patients to the patiromer- or control group at a 1:1 ratio, stratified by albuminuria  $>1000\text{mg/g}$  (Yes/No) and diabetes (Yes/No). These stratifications have been included to minimize imbalances in patients with diabetes or severe albuminuria as such may have a different pathophysiology and thereby response to treatment compared to non-diabetics and patients with moderate albuminuria. The Random allocation list is generated and uploaded to REDCap by an independent service provider (Clinical Trial Unit, Dept. of Clinical Medicine, Aarhus University) maintaining proper allocation concealment of randomisation.

After randomisation, patients are followed for up to 52 weeks with blood sampling and outpatient visits every 3 months and allowing for additional visits if considered clinically required based on the assessment of the local investigator.

The dose of study drugs (RAAS-blockade) is determined by the four steps previously described, aiming at the possible highest step with a P-potassium  $<5.5\text{mmol/L}$ . Dose increases are only allowed on planned consultations (phone or outpatient clinic), but decreases may be introduced at any point depending on the results of blood test, BP or other adverse effects. In the patiromer group, patiromer is prescribed as tolerated at a daily dose of 8,4g, 16,8g or 25,2g in order to maintain P-potassium  $<5.5\text{mmol/L}$ . The dosing of patiromer is increased concomitantly with any increase in RAAS-blockade, unless P-potassium is  $\leq 4.6\text{mmol/L}$ . RAAS-blockade is decreased if hyperkalaemia  $>5.5\text{mmol/L}$  is recorded at the highest tolerated patiromer dose.

All study drugs are stopped at the last outpatient visit after 52 weeks. Patients entering the study on ACE-I/ARB will continue this treatment without patiromer. Blood and urine samples are collected 4 weeks later for the evaluation of eGFR, albuminuria and P-potassium after discontinuation of study drugs.

### Additional medication

Any inhibitors of the RAAS-system other than those mentioned above as well as additional potassium binders are not allowed during the study period. Hypertension is treated aiming at a systolic BP between 110-130mmHg in both groups. All anti-hypertensives, except additional inhibitors of the RAAS-system, may be used as per the discretion of the treating physician. Loop and thiazide diuretics may be prescribed for hypertension and/or fluid retention. Hypomagnesemia is treated with oral magnesium supplements. Study drugs including losartan, spironolactone and patiromer can be reduced or suspended depending on blood pressure, hyperkalaemia as per protocol or any side effects deemed to outweigh the benefit of the treatment (e.g. AKI, gastrointestinal intolerance, biochemical abnormalities). SGLT2-inhibitors may not be prescribed during the trial.

## Endpoints

The primary endpoint is:

- The difference in UACR from randomisation to end of treatment compared between the two groups. This is measured as an average of two morning spot UACR samples collected both at randomisation and at the last study visit

Secondary endpoints include:

- The difference in 24h urine albumin from randomisation to end of treatment compared between the two groups
- The difference in albuminuria (evaluated by morning spot UACR and 24h urine collection) at the end of treatment between the two groups
- The difference in the extent of RAAS-blockade (ACE-I/ARB and MRA) at the end of treatment between the two groups
- The difference in kidney function (eGFR and urine creatinine clearance) at the end of treatment and the changes in eGFR from randomisation to end of treatment between the two groups
- The difference in BP (ambulatory and 24h) at the end of treatment and the changes in BP from randomisation to end of treatment between the two groups
- The difference in PWV/pulse wave analysis (PWA) at the end of treatment and the changes in PWV/PWA from randomisation to end of treatment between the two groups
- The difference in LVM (ECG) at the end of treatment and the changes in LVM from randomisation to end of treatment between the two groups
- The difference in cardiac biomarkers at the end of treatment and the changes in cardiac biomarkers from randomisation to end of treatment between the two groups
- The difference in P-potassium at the end of treatment between the two groups
- The difference in the number of episodes with severe hyperkalaemia (>6.2mmol/L) from randomisation to end of treatment between the two groups
- The difference in the number of episodes with AKI (KDIGO stage 1-3) from randomisation to end of treatment between the two groups
- The difference in the questionnaire base assessment of the consumption of fruits and vegetables at the end of treatment and the changes in fruits and vegetables consumption from randomisation to end of treatment between the two groups
- The difference in QoL at the end of treatment and the changes in QoL from randomisation to end of treatment between the two groups

## Sample size and power calculation

The study will include 140 patients under the assumption that 30% will not meet randomisation criteria, leaving 98 participants (49 in each group) for randomisation. This will provide 80% power to detect a clinically relevant 1.5-fold greater reduction in the amount of albuminuria in the patiromer group compared to the control group, with a risk of type 1 error of 0.05 assuming an 80% coefficient of variation in the change of UACR[37]. The study will continue as long as the number of randomised participants is expected to be no less than 55% (54 patients), which will provide power to detect a 1.75-fold greater reduction in the amount of albuminuria.

## Recruitment

1  
2  
3  
4 All patients from the renal outpatient clinics at the three centers and all patients serviced by Aarhus  
5 University Hospital (covering a population of approx. 900,000) who have provided a blood sample within  
6 the last 2 years are prescreened. The prescreening algorithm uses the LABKA II database containing the  
7 result of all blood samples analyzed within the relevant regions and identifies patients aged 18-80 with a  
8 history (within 2 years) of P-potassium > 4.5mmol/L, UACR >200mg/g and eGFR 25-60 mL/min/1.73m<sup>2</sup>. The  
9 resulting patient records including blood samples are manually screened by a local investigator. Potentially  
10 eligible patients are contacted with the participant information by letter. In addition, patients in the  
11 nephrology outpatient clinics in Aarhus, Aalborg, Holstebro and Viborg and the diabetes outpatient clinic in  
12 Aarhus are contacted in person at their next appointment. After written informed consent they are  
13 screened for inclusion including blood samples to ensure that they meet the inclusion criteria at the time of  
14 inclusion.  
15  
16  
17

### 18 **Data collection**

19  
20 The patient's medical history including current treatment is registered at inclusion. Patient height is  
21 measured at inclusion and weight at every visit. A physical examination including vital signs are performed  
22 at inclusion, randomisation and final visit. A urine sample for UACR is collected at inclusion, twice at  
23 randomisation and final visit for the primary outcome and at every three-month-visit during the treatment  
24 phase. If possible, a morning sample is preferred. Timed 24h urine samples are collected at randomisation  
25 and 52 weeks. P-potassium, creatinine, eGFR and sodium are measured at inclusion, weekly during the run-  
26 in phase, during titration of RAAS-blockade and every 3 months in the outpatient clinic. P-total CO<sub>2</sub> and  
27 ionized calcium are measured at inclusion, randomisation and every 3-month visit. P-magnesium is  
28 measured at all visits during the maintenance phase in the patiromer group. Cardiac biomarkers  
29 (Endothelin-1, NT-proBNP and Tnl), ECG, blood samples evaluating biomarkers of fruit and vegetable  
30 consumption (lutein, β-cryptoxanthin, α- and β-carotene, lycopene and vitamin C[38]), PWV and PWA as a  
31 measure of arteriosclerosis, SF-36[39] questionnaire measuring QoL, MyFood24[40] food diaries and 24h  
32 ABPM are all performed at randomisation and 52 weeks. Please refer to table 1 for a timeline of data  
33 collection.  
34  
35  
36  
37  
38  
39  
40  
41  
42  
43  
44  
45  
46  
47  
48  
49  
50  
51  
52  
53  
54  
55  
56  
57  
58  
59  
60

**Table 1: Study timeline and visits**

| Timeline (weeks)                                                                                                                               | Inclusion<br>-8 | -6 | -4* | -2* | t <sub>0</sub><br>Randomisation<br>/(exclusion) | 2* | 4* | 13 | 26 | 39 | 52 | 56 |
|------------------------------------------------------------------------------------------------------------------------------------------------|-----------------|----|-----|-----|-------------------------------------------------|----|----|----|----|----|----|----|
| <b>STUDY PHASE:</b>                                                                                                                            | Run-in phase    |    |     |     | Maintenance phase                               |    |    |    |    |    |    |    |
| <b>INTERVENTIONS:</b>                                                                                                                          |                 |    |     |     |                                                 |    |    |    |    |    |    |    |
| Increased RAAS-blockade                                                                                                                        | →               |    |     |     |                                                 |    |    |    |    |    |    |    |
| Patiromer-treatment<br>(intervention group)<br>and/or RAAS-blockade titration                                                                  |                 |    |     |     |                                                 |    |    |    |    |    |    |    |
| <b>ASSESSMENTS:</b>                                                                                                                            |                 |    |     |     |                                                 |    |    |    |    |    |    |    |
| Eligibility screen                                                                                                                             | x               |    |     |     |                                                 |    |    |    |    |    |    |    |
| Informed consent                                                                                                                               | x               |    |     |     |                                                 |    |    |    |    |    |    |    |
| Pregnancy test (if fertile<br>woman)                                                                                                           | x               |    |     |     |                                                 |    |    |    |    |    |    |    |
| Medical record                                                                                                                                 | x               |    |     |     |                                                 |    |    |    |    |    |    |    |
| Physical examination                                                                                                                           | x               |    |     |     | x                                               |    |    |    |    |    | x  |    |
| Weight                                                                                                                                         | x               |    |     |     | x                                               |    |    | x  | x  | X  | x  |    |
| Dietary counselling                                                                                                                            | x               |    |     |     |                                                 |    |    |    |    |    |    |    |
| P-Creatinine, eGFR, P-<br>Potassium, P-Sodium                                                                                                  | x               | X  | x   | x   | x                                               | x  | x  | x  | x  | X  | x  | x  |
| P-magnesium (patiromer<br>group)                                                                                                               |                 |    |     |     | x                                               | x  | x  | x  | x  | X  | x  |    |
| P-total CO <sub>2</sub> , P-ionized Calcium                                                                                                    | x               |    |     |     | x                                               |    |    | x  | x  | X  | x  | x  |
| BpTRU® or similar local ABPM                                                                                                                   | x               |    |     |     | x                                               |    |    | x  | x  | X  | x  |    |
| 24h ABPM                                                                                                                                       |                 |    |     |     | x                                               |    |    |    |    |    | x  |    |
| At-home ABPM                                                                                                                                   |                 | x  | x   | x   |                                                 | x  | x  |    |    |    |    |    |
| UACR                                                                                                                                           | x               | x  | x   | x   | xx                                              |    |    | x  | x  |    | xx | x  |
| Questionnaire – Side effects                                                                                                                   | x               |    |     |     | x                                               |    |    | x  | x  | X  | x  |    |
| Questionnaire – SF-36[39]<br>(QoL)                                                                                                             |                 |    |     |     | x                                               |    |    |    |    |    | x  |    |
| Questionnaire –<br>MyFood24[40]                                                                                                                |                 |    |     |     | x                                               |    |    |    |    |    | x  |    |
| Carotenoids and C-Vitamin                                                                                                                      |                 |    |     |     | x                                               |    |    |    |    |    | x  |    |
| 24h urine collection                                                                                                                           |                 |    |     |     | x                                               |    |    |    |    |    | x  |    |
| PWA/PWV                                                                                                                                        |                 |    |     |     | x                                               |    |    |    |    |    | x  |    |
| ECG                                                                                                                                            |                 |    |     |     | x                                               |    |    |    |    |    | x  |    |
| Endothelin-1, NT-proBNP and<br>Tnl                                                                                                             |                 |    |     |     | x                                               |    |    |    |    |    | x  |    |
| Pill count                                                                                                                                     |                 |    |     |     | x (x)                                           |    |    | x  | x  | X  | x  |    |
| <b>TYPE OF VISIT:</b>                                                                                                                          |                 |    |     |     |                                                 |    |    |    |    |    |    |    |
| Phone consultation                                                                                                                             |                 | x  | x   | x   |                                                 | x  | x  |    |    |    |    |    |
| Outpatient clinic                                                                                                                              | x               |    |     |     | x (x)                                           |    |    | x  | x  | X  | x  |    |
| *Only If RAAS-blockade has been increased. During the run-in phase, the patient proceeds directly to randomisation if P-potassium > 5.5mmol/L. |                 |    |     |     |                                                 |    |    |    |    |    |    |    |

Questionnaires and food diaries may be filled in online prior to the visit using REDCap or the Myfood24 website. An invitation with a unique link is sent to the patient via e-mail. Alternatively, they are completed with the assistance of the investigator on the day of the visit. Vital signs are measured using BpTRU® or equivalent at every visit and with an automatic digital blood pressure monitor at home for phone consultations. Pill counts are done at every visit to assess compliance. Patients are asked if and to what

1  
2  
3  
4 extent they have taken the study drugs at all contacts. Adherence techniques such as morning routines and  
5 medication in relation to meals are discussed if required.  
6

7 Blood and urine biochemical analyses are performed at local biochemical laboratories using standard  
8 automated assay. Reference intervals have been standardized on a national level and all Danish laboratory  
9 uses these for reference. The UACR at randomisation and final visit is calculated as an average of 2  
10 measurements over two days at each timepoint to minimize variability[41]. The patient is carefully  
11 instructed to provide morning urine samples. Urine collection, including 24h urine collection, is performed  
12 by the patient at home prior to the randomisation and 12-month-visit. PWV and PWA are measured using  
13 the Sphygmocor system. Applanation tonometry is applied on the carotid, femoral, and radial artery. A  
14 minimum operator index of 85 is used. Length is measured as 80% of the distance from the carotid artery  
15 to the femoral artery. Home BP is measured three times in the morning and evening for three days. An  
16 average of day 2 and 3 is reported. Twenty-four-hour ABPM is recorded with measurements every 30  
17 minutes. ECG is recorded by an experienced nurse. Each centers' personnel will be trained and instructed in  
18 all study procedures by the study PI.  
19  
20  
21

## 22 **Data management**

23  
24 Study data, including adverse events (AE) and serious adverse events/reactions (SAE/SAR), will be collected  
25 and managed using REDCap electronic data capture tools hosted at Aarhus University[42,43]. All data are  
26 entered electronically by the local investigator at each site. Original data is stored in the patients' electronic  
27 records or in a participant file. Participant files are stored in a secure place and kept for 15 years after end  
28 of study. Data will be exported from RedCap for final analysis using a suitable statistical software package.  
29  
30

## 31 **Statistical methods**

32  
33 The primary endpoint is analyzed using a t-test comparing the differences in UACR between randomisation  
34 and 12 months between the two groups. The ratio between groups with confidence intervals and the P-  
35 value will be reported. A secondary two-way repeated measures ANOVA including UACR at randomisation,  
36 3, 6, 9 and 12 months is performed and the P-value is reported. The data is analyzed as intention-to-treat  
37 with a secondary treated-as analysis. A separate t-test will compare the difference in UACR from  
38 randomisation to the time patiromer is discontinued. Data from patients discontinuing treatment before 12  
39 months of follow-up is included using carry-over of the last available dataset before stopping. Missing data  
40 for the primary endpoint will be replaced by the most recent observation carried over. Previous studies  
41 have shown that most of the effect of increased RAAS-blockade on albuminuria is seen early after  
42 treatment initiation with little change thereafter, suggesting that the UACR at the closest possible time-  
43 point is a fair proxy measure of the 12-month value. Imputations may be applied for secondary analyses if  
44 feasible. All variables are analyzed for normal distribution and skewed data are log-transformed when  
45 appropriate. Non-normally distributed variables on both the standard- and log-scale are analyzed using  
46 non-parametric testing. Repeated measurements are analyzed by a linear model when feasible.  
47  
48  
49

## 50 **Safety measures**

51  
52 Adverse events, defined as any medical occurrence in a trial participant without regard to the possible  
53 cause, are collected from when the consent has been signed and until final visit. Participants are asked  
54 about any new such events at each contact and will fill out a questionnaire at each outpatient clinic visit.  
55 Serious adverse events will be reported directly to the PI and sponsor. Investigators will evaluate any  
56 adverse event's possible relation to study drugs based on temporal relationship, known mechanism of  
57 action and known side effects for classification of adverse reactions.  
58  
59  
60

1  
2  
3  
4  
5  
6  
7  
8  
9  
10  
11  
12  
13  
14  
15  
16  
17  
18  
19  
20  
21  
22  
23  
24  
25  
26  
27  
28  
29  
30  
31  
32  
33  
34  
35  
36  
37  
38  
39  
40  
41  
42  
43  
44  
45  
46  
47  
48  
49  
50  
51  
52  
53  
54  
55  
56  
57  
58  
59  
60

The following individual safety-outcomes are evaluated by the investigator at each contact:

1. A decline in eGFR > 30% from inclusion, 20% from previous visit or 5 mL/min/1.73 m<sup>2</sup> from previous visit if eGFR < 25 mL/min/1.73 m<sup>2</sup> should lead to a temporary reduction or discontinuation of spironolactone and/or ACE-I/ARB (Losartan or other)
2. An increase in P-creatinine > 100% from the previous visit, the possible need for acute dialysis or other findings suggesting severe AKI leads to admittance for treatment
3. If P-potassium is >5.5mmol/L on maximal patiromer dose, RAAS-blockade is reduced by 50% or spironolactone is discontinued. P-potassium is repeated within two days or as soon as possible
4. If P-potassium is > 5.9mmol/L, ACE-I/ARB and spironolactone are temporarily discontinued. P-potassium is repeated within one day
5. If P-potassium is > 6.2mmol/L, the patient is admitted and treated in accordance with local guidelines. ACE-I/ARB and spironolactone are temporarily discontinued.
6. If P-magnesium is < 0.6mmol/L, the patient is treated with oral magnesium supplements as per discretion of the local investigator and P-magnesium is repeated within 7-10 days.
7. If P-magnesium is < 0.5mmol/L despite maximal tolerated magnesium supplement treatment, patiromer is discontinued and p-magnesium is repeated within two days

In case of events 1-5 above, RAAS-blockade may be reinitiated at the previous dosage if and when kidney function is restored and/or P-potassium < 5.4mmol/L following discontinuation or dose reduction of the RAAS inhibitor.

The study is halted if at any point a significant higher number of the following events are observed in patiromer group compared to the control group:

1. Events with hyperkalaemia > 6.2mmol/L
2. Patients with eGFR < 15 mL/min/1.73 m<sup>2</sup> or requiring dialysis for > 3 months
3. Deaths
4. Admissions (except events due to hyperkalaemia, covered in point 1)
5. A combined endpoint of the four above

These outcomes will be evaluated by the PI after each such event using Fischer's exact test.

### **Study oversight and monitoring.**

The study is monitored by the GCP unit at Aarhus and Aalborg University Hospitals. It does not include an independent data monitoring committee due to the open label design, limited number of sites and continuous monitoring of significant safety outcomes as described above. Any systematic or serious risk to the participants will be immediately apparent to the PI and sponsor. The study may be audited by the Danish Medicines Agency. Safety reports are forwarded to the Danish Medicines Agency and The Central Denmark Region Committees on Health Research Ethics annually.

### **Patient and Public Involvement statement**

Participants were involved in changes to the design of the study. They preferred less transportation and fewer hospital visits. From their feedback, some visits were replaced by phone consultations and blood sampling prior to most visits was made possible at 28 local sites across the Central Denmark Region. Once

1  
2  
3  
4 the trial has been published, participants will be informed of the results via e-mail using the REDCap  
5 distribution tool.  
6  
7

### 8 9 **Current trial status**

10  
11 The first participant was included in the study late August 2020 and is planned to continue until March  
12 2022. At the time of writing (August 2021), 56 participants have been included and 14 have been  
13 randomised to the treatment phase. Enrollment was halted from December 2020 due to the lockdown  
14 following COVID-19 in Denmark but was resumed in March 2021.  
15  
16

### 17 18 **ETHICS AND DISSEMINATION**

19  
20 The study protocol was initially approved by The Central Denmark Region Committees on Health Research  
21 Ethics (REFNO 1-10-72-110-20) on June 23<sup>rd</sup> 2020 with the latest version being approved on July 1<sup>st</sup> 2021  
22 and by the Danish Medicines Agency on June 10<sup>th</sup> 2021. The research will be conducted in accordance with  
23 the Helsinki Declaration and Good Clinical Practice. All protocol amendments will be approved by the Ethics  
24 Committee and Danish Medicines Agency before implementation when required and all investigators will  
25 be notified directly.  
26  
27

28 A local investigator will obtain a written, informed consent from all participants prior to inclusion. The  
29 consent form follows the standards and template from the Danish National Committee on Health Research  
30 Ethics.  
31

32 All principal investigators and sponsor will have access to the cleaned dataset.

33  
34 Trial results, positive as well as negative, will be submitted for publication in peer reviewed, international  
35 journals and presented at conferences and meetings.  
36

### 37 38 **DISCUSSION**

39 This study investigates the feasibility of daily treatment with an established potassium-binding agent in  
40 moderate and severe CKD patients with albuminuria. It will examine if treatment enables increased RAAS-  
41 blockade and leads to a greater decline in albuminuria. Previous studies have shown that patiromer allows  
42 for the use of spironolactone in CKD patients with hyperkalaemia[44]; however, it is unknown if the  
43 approach leads to an effect on albuminuria in this distinct group of patients. The study aims to fill this gap  
44 in current knowledge.  
45  
46

47 The open label study design should closely mimic the clinical decision making and the delicate task of  
48 balancing hyperkalaemia and renoprotection. This will provide information on the practicability and  
49 potential benefits of such an approach in patients with hyperkaliemia otherwise barred from full  
50 pharmaceutical blockage of the RAAS-system. Of note, the study includes a one-year follow-up to examine  
51 potential complications to long-term treatment including non-adherence, hypotension, AKI and other  
52 adverse effects. Additional strengths of the study include the extensive list of outcomes and the RCT design.  
53 Furthermore, the unique and selective run-in phase only allows randomisation of patients that are proven  
54 to potentially benefit from treatment with a potassium binder, which should be in accordance with clinical  
55 practice. In addition, since all included interventions involves established and approved drugs, the road to  
56 implementation ought to be short.  
57  
58  
59  
60



1  
2  
3  
4 There are some potential limitations and challenges. First, the small sample size and one-year follow-up  
5 does not allow for evaluation of harder renal endpoints such as progression to end-stage renal disease or a  
6 50% reduction in eGFR. However, albuminuria is a widely accepted surrogate marker of disease progression  
7 in albuminuric CKD. In addition, it is closely correlated to the protective effects of RAAS-blockade. Second,  
8 the study is not powered to detect minor differences in the change in albuminuria; however, it will be able  
9 to identify a 1.5 times greater reduction in UACR. Third, the one-year follow-up may challenge patient  
10 adherence to treatment. Fourth, patients already treated with ACE-I or ARB may be on a sub-maximal dose  
11 of these medications when Spironolactone is added as per protocol to their current treatment. This was  
12 considered necessary to avoid the complexity of either having to manage a large number of different ACE-Is  
13 or ARBs as potential study drugs or requiring an initial switch to e.g. Losartan, which may increase the  
14 duration of the run-in phase significantly and thus, the risk of early participant drop out. Fifth, the open-  
15 label design may introduce selection bias in physicians' use of non-investigational drugs. Standard  
16 operating procedures on concomitant treatment, including instructions for the use of diuretics, are  
17 established to mitigate such bias. The open label design does provide some potential benefits, allowing for  
18 a setup that closely resembles clinical practice and for a more practical safety algorithm to prevent  
19 potentially life-threatening hyperkalaemia. The primary outcome is based on biochemical findings. It is very  
20 unlikely that this is affected by the open label design.

21  
22  
23  
24  
25 The power calculations are based on the number of randomised patients after the run-in phase. It is  
26 assumed that 30% of the included patient will not be eligible for randomisation; however, the accuracy of  
27 this number has not been established and thus, the number of actual randomised patients may be  
28 different. The extensive screening algorithm, which is based on results from blood samples in all 4  
29 outpatient clinics and the entire Aarhus University public admission area, will however ensure that all  
30 eligible candidates are invited to the study. This is particularly important as the number of patients with an  
31 eGFR between 25 and 60 mL/min/1.73m<sup>2</sup>, concomitant and significant albuminuria, and previous or current  
32 P-potassium >4.5mmol/L may be limited.

33  
34  
35  
36 The study is partly based on the assumption that adding MRA to ACE-I/ARB treatment in this subgroup of  
37 patients is beneficial if hyperkalaemia can be controlled, supported by the recent results of the FIDELIO-  
38 DKD trial [25]; however, the underlying principle is also applicable to patients in which maximal dosing of  
39 ACE-I or ARBs is barred by hyperkalaemia. If this study establishes the feasibility of such approach, it should  
40 pave the way for larger studies with hard endpoints to corroborate the use of potassium binders in patients  
41 currently excluded from maximal RAAS-inhibition.

## 42 43 44 45 **ROLES AND RESPONSIBILITIES**

46  
47 **Contributorship statement:** HB conceived the study and had editorial rights on the protocol. FHM was first  
48 author of the protocol, primary investigator in Aarhus and implemented the study on all sites as the  
49 coordinating investigator. CDP held an advisory role in the writing of the protocol. JHC was the primary  
50 investigator in Aalborg. All authors contributed to refinement of the study protocol including the design  
51 and approved the final manuscript.

### 52 53 54 **Sponsor and funder roles:**

55  
56 HB (sponsor) conceived the study and the design hereof. Vifor Pharma has been allowed access to and  
57 commented on the protocol before funding the study, but had no decisive influence on the design. Vifor  
58  
59  
60

1  
2  
3  
4 will be informed on the progression of the study and on SAEs relating to patiomer, but will not have any  
5 influence on the execution, the data analyses, the interpretation of data, or the decision to submit results.  
6

7  
8 Lead investigators: A lead investigator (senior nephrologist) will be identified at each site. The lead  
9 investigator is responsible for identification of potential study subjects, recruitment hereof, data collection  
10 and completion of CRFs, along with follow up of study patients and adherence to study protocol and  
11 investigators brochure. The lead investigator may appoint sub-investigators to act on his or her behalf.  
12

### 13 **FUNDING**

14  
15 This work is supported by Aarhus University Graduate School and by Vifor Pharma. The latter includes free  
16 of charge patiomer.  
17

### 18 **Study administration, financial statement and conflicts of interest**

19  
20 Neither the study sponsor (HB), PI (FHM) nor any other investigators have any financial involvement with  
21 the primary funder (Vifor Pharma) or the primary study drug (patiomer). HB has previously participated in  
22 advisory boards and meetings hosted by Vifor Pharma. These have all been reported to the Danish  
23 Medicines Agency. The authors have no further conflicts of interest to declare.  
24  
25

### 26 **REGISTRATIONS**

27  
28  
29 Registration: EudraCT: 2020-001595-15

30  
31 Sponsor protocol code: 270389-010520

32  
33 Protocol version 15, June 26<sup>th</sup> 2021

34  
35 First approval from Ethics Committee (The Central Denmark Region Committees on Health Research  
36 Ethics): June 23<sup>rd</sup> 2020

37  
38 First approval from the Danish Medicines Agency: June 4<sup>th</sup> 2020  
39  
40

### 41 **Figure 1: Flowchart of the trial design**

42  
43 UACR: Urine albumin/creatinine ratio, 24h ABPM: 24-hour ambulatory blood pressure monitoring, ECG:  
44 electrocardiogram, PWA: Pulse wave analysis, PWV: Pulse wave velocity, RAAS-blockade: Renin angiotensin  
45 aldosterone system blockade (losartan and/or spironolactone).  
46  
47  
48  
49  
50  
51  
52  
53  
54  
55  
56  
57  
58  
59  
60

## REFERENCES

- 1 Chen TK, Knicely DH, Grams ME. Chronic Kidney Disease Diagnosis and Management: A Review. *JAMA - Journal of the American Medical Association*. 2019;**322**:1294–304. doi:10.1001/jama.2019.14745
- 2 Iseki K, Kinjo K, Iseki C, *et al*. Relationship between predicted creatinine clearance and proteinuria and the risk of developing ESRD in Okinawa, Japan. *American Journal of Kidney Diseases* 2004;**44**:806–14. doi:10.1053/j.ajkd.2004.07.007
- 3 Weinberg MS, Kaperonis N, Bakris GL. How high should an ACE inhibitor or angiotensin receptor blocker be dosed in patients with diabetic nephropathy? *Current Hypertension Reports*. 2003;**5**:418–25. doi:10.1007/s11906-003-0088-8
- 4 Brenner BM, Cooper ME, De Zeeuw D, *et al*. Effects of losartan on renal and cardiovascular outcomes in patients with type 2 diabetes and nephropathy. *New England Journal of Medicine* 2001;**345**:861–9. doi:10.1056/NEJMoa011161
- 5 Lewis EJ, Hunsicker LG, Bain RP, *et al*. The Effect of Angiotensin-Converting-Enzyme Inhibition on Diabetic Nephropathy. *New England Journal of Medicine* 1993;**329**:1456–62. doi:10.1056/NEJM19931113292004
- 6 Levey AS, Gansevoort RT, Coresh J, *et al*. Change in Albuminuria and GFR as End Points for Clinical Trials in Early Stages of CKD: A Scientific Workshop Sponsored by the National Kidney Foundation in Collaboration With the US Food and Drug Administration and European Medicines Agency. In: *American Journal of Kidney Diseases*. W.B. Saunders 2020. 84–104. doi:10.1053/j.ajkd.2019.06.009
- 7 Waijer SW, Gansevoort RT, Heerspink HJL. Change in albuminuria as a surrogate endpoint. *Current Opinion in Nephrology and Hypertension* 2019;**28**:519–26. doi:10.1097/MNH.0000000000000541
- 8 Balamuthusamy S, Srinivasan L, Verma M, *et al*. Renin angiotensin system blockade and cardiovascular outcomes in patients with chronic kidney disease and proteinuria: A meta-analysis. *American Heart Journal*. 2008;**155**:791–805. doi:10.1016/j.ahj.2008.01.031
- 9 Stenvinkel P, Ketteler M, Johnson RJ, *et al*. IL-10, IL-6, and TNF- $\alpha$ : Central factors in the altered cytokine network of uremia - The good, the bad, and the ugly. *Kidney International* 2005;**67**:1216–33. doi:10.1111/j.1523-1755.2005.00200.x
- 10 Navalkar S, Parthasarathy S, Santanam N, *et al*. Irbesartan, an angiotensin type 1 receptor inhibitor, regulates markers of inflammation in patients with premature atherosclerosis. *Journal of the American College of Cardiology* 2001;**37**:440–4. doi:10.1016/S0735-1097(00)01138-4
- 11 Peters CD, Kjaergaard KD, Jensen JD, *et al*. No significant effect of angiotensin II receptor blockade on intermediate cardiovascular end points in hemodialysis patients. *Kidney International* 2014;**86**:625–37. doi:10.1038/ki.2014.69
- 12 Jankowich M, Choudhary G. Endothelin-1 levels and cardiovascular events. *Trends in Cardiovascular Medicine*. 2019. doi:10.1016/j.tcm.2019.01.007
- 13 Barton M. Reversal of proteinuric renal disease and the emerging role of endothelin. *Nature Clinical Practice Nephrology*. 2008;**4**:490–501. doi:10.1038/ncpneph0891

- 1  
2  
3  
4 14 Dahlöf B, Devereux RB, Kjeldsen SE, *et al.* Cardiovascular morbidity and mortality in the Losartan  
5 Intervention For Endpoint reduction in hypertension study (LIFE): A randomised trial against  
6 atenolol. *Lancet* 2002;**359**:995–1003. doi:10.1016/S0140-6736(02)08089-3  
7  
8 15 Malmqvist K, Kahan T, Edner M, *et al.* Regression of left ventricular hypertrophy in human  
9 hypertension with irbesartan. *Journal of Hypertension* 2001;**19**:1167–76. doi:10.1097/00004872-  
10 200106000-00023  
11  
12 16 Barrera-Chimal J, Girerd S, Jaisser F. Mineralocorticoid receptor antagonists and kidney diseases:  
13 pathophysiological basis. *Kidney International*. 2019;**96**:302–19. doi:10.1016/j.kint.2019.02.030  
14  
15 17 Gilbert KC, Brown NJ. Aldosterone and inflammation. *Current Opinion in Endocrinology, Diabetes*  
16 *and Obesity* 2010;**17**:199–204. doi:10.1097/MED.0b013e3283391989  
17  
18 18 Shavit L, Lifschitz MD, Epstein M. Aldosterone blockade and the mineralocorticoid receptor in the  
19 management of chronic kidney disease: Current concepts and emerging treatment paradigms.  
20 *Kidney International*. 2012;**81**:955–68. doi:10.1038/ki.2011.505  
21  
22 19 Remuzzi G, Cattaneo D, Perico N. The aggravating mechanisms of aldosterone on kidney fibrosis.  
23 *Journal of the American Society of Nephrology* 2008;**19**:1459–62. doi:10.1681/ASN.2007101079  
24  
25 20 Berl T, Katz FH, Henrich WL, *et al.* Role of aldosterone in the control of sodium excretion in patients  
26 with advanced chronic renal failure. *Kidney International* 1978;**14**:228–35. doi:10.1038/ki.1978.114  
27  
28 21 Hene RJ, Boer P, Koomans HA, *et al.* Plasma aldosterone concentrations in chronic renal disease.  
29 *Kidney International* 1982;**21**:98–101. doi:10.1038/ki.1982.14  
30  
31 22 Bomback AS, Klemmer PJ. The incidence and implications of aldosterone breakthrough. *Nature*  
32 *Clinical Practice Nephrology*. 2007;**3**:486–92. doi:10.1038/ncpneph0575  
33  
34 23 Alexandrou M-E, Papagianni A, Tsapas A, *et al.* Effects of mineralocorticoid receptor antagonists in  
35 proteinuric kidney disease. *Journal of Hypertension* 2019;**37**:2307–24.  
36 doi:10.1097/HJH.0000000000002187  
37  
38 24 Currie G, Taylor AHM, Fujita T, *et al.* Effect of mineralocorticoid receptor antagonists on proteinuria  
39 and progression of chronic kidney disease: A systematic review and meta-analysis. *BMC Nephrology*.  
40 2016;**17**. doi:10.1186/s12882-016-0337-0  
41  
42 25 Bakris GL, Agarwal R, Anker SD, *et al.* Effect of Finerenone on Chronic Kidney Disease Outcomes in  
43 Type 2 Diabetes. *New England Journal of Medicine* 2020;**383**:2219–29. doi:10.1056/nejmoa2025845  
44  
45 26 Weiss JN, Qu Z, Shivkumar K. Electrophysiology of hypokalemia and hyperkalemia. *Circulation:*  
46 *Arrhythmia and Electrophysiology* 2017;**10**. doi:10.1161/CIRCEP.116.004667  
47  
48 27 Kovesdy CP. Management of hyperkalaemia in chronic kidney disease. *Nature reviews Nephrology*  
49 2014;**10**:653–62. doi:10.1038/nrneph.2014.168  
50  
51 28 Georgianos PI, Agarwal R. Revisiting RAAS blockade in CKD with newer potassium-binding drugs.  
52 *Kidney international* 2018;**93**:325–34. doi:10.1016/j.kint.2017.08.038  
53  
54 29 Raebel MA. Hyperkalemia Associated with Use of Angiotensin-Converting Enzyme Inhibitors and  
55 Angiotensin Receptor Blockers. *Cardiovascular Therapeutics*. 2012;**30**. doi:10.1111/j.1755-  
56 5922.2010.00258.x  
57  
58  
59  
60

1  
2  
3  
4  
5  
6  
7  
8  
9  
10  
11  
12  
13  
14  
15  
16  
17  
18  
19  
20  
21  
22  
23  
24  
25  
26  
27  
28  
29  
30  
31  
32  
33  
34  
35  
36  
37  
38  
39  
40  
41  
42  
43  
44  
45  
46  
47  
48  
49  
50  
51  
52  
53  
54  
55  
56  
57  
58  
59  
60

- 30 Kumar R, Kanev L, Woods SD, *et al.* Managing hyperkalemia in high-risk patients in long-term care. *The American journal of managed care* 2017;**23**:S27–36.
- 31 Bakris GL, Pitt B, Weir MR, *et al.* Effect of patiromer on serum potassium level in patients with hyperkalemia and diabetic kidney disease the AMETHYST-DN randomized clinical trial. *JAMA - Journal of the American Medical Association* 2015;**314**:151–61. doi:10.1001/jama.2015.7446
- 32 Weir MR, Bakris GL, Bushinsky DA, *et al.* Patiromer in patients with kidney disease and hyperkalemia receiving RAAS inhibitors. *New England Journal of Medicine* 2015;**372**:211–21. doi:10.1056/NEJMoa1410853
- 33 Sutherland C, Braunhofer P, Vrouchou P, *et al.* A Cost-Utility Analysis Of Raasi Enabling-Patiromer In Patients With Hyperkalemia. *Value in Health* 2017;**20**:A490. doi:10.1016/j.jval.2017.08.519
- 34 Cupisti A, Kovesdy CP, D'Alessandro C, *et al.* Dietary Approach to Recurrent or Chronic Hyperkalaemia in Patients with Decreased Kidney Function. *Nutrients* 2018;**10**. doi:10.3390/nu10030261
- 35 Official JOurnal Of the internatiOnal SOciety Of nephroLOgy KDIGO Clinical Practice Guideline for the Management of Blood Pressure in Chronic Kidney Disease KDIGO Clinical Practice Guideline for the Management of Blood Pressure in Chronic Kidney Disease. Published Online First: 2012.http://www.kidney-international.org (accessed 10 Jan 2022).
- 36 Karalliedde J, Viberti G. Evidence for renoprotection by blockade of the renin-angiotensin - aldosterone system in hypertension and diabetes. *Journal of Human Hypertension*. 2006;**20**:239–53. doi:10.1038/sj.jhh.1001982
- 37 Belle G, Martin DC. Sample size as a function of coefficient of variation and ratio of means. *American Statistician* 1993;**47**:165–7. doi:10.1080/00031305.1993.10475968
- 38 Woodside J V., Draper J, Lloyd A, *et al.* Use of biomarkers to assess fruit and vegetable intake. In: *Proceedings of the Nutrition Society*. Cambridge University Press 2017. 308–15. doi:10.1017/S0029665117000325
- 39 Lins L, Carvalho FM. SF-36 total score as a single measure of health-related quality of life: Scoping review. *SAGE Open Medicine* 2016;**4**:205031211667172. doi:10.1177/2050312116671725
- 40 Wark PA, Hardie LJ, Frost GS, *et al.* Validity of an online 24-h recall tool (myfood24) for dietary assessment in population studies: Comparison with biomarkers and standard interviews. *BMC Medicine* 2018;**16**. doi:10.1186/s12916-018-1113-8
- 41 Naresh CN, Hayen A, Weening A, *et al.* Day-to-day variability in spot urine albumin-creatinine ratio. *American Journal of Kidney Diseases* 2013;**62**:1095–101. doi:10.1053/j.ajkd.2013.06.016
- 42 Harris PA, Taylor R, Thielke R, *et al.* Research electronic data capture (REDCap)-A metadata-driven methodology and workflow process for providing translational research informatics support. *Journal of Biomedical Informatics* 2009;**42**:377–81. doi:10.1016/j.jbi.2008.08.010
- 43 Harris PA, Taylor R, Minor BL, *et al.* The REDCap consortium: Building an international community of software platform partners. *Journal of Biomedical Informatics*. 2019;**95**. doi:10.1016/j.jbi.2019.103208

- 1  
2  
3  
4 44 Agarwal R, Rossignol P, Romero A, *et al.* Patiromer versus placebo to enable spironolactone use in  
5 patients with resistant hypertension and chronic kidney disease (AMBER): a phase 2, randomised,  
6 double-blind, placebo-controlled trial. *Lancet (London, England)* Published Online First: 13  
7 September 2019. doi:10.1016/S0140-6736(19)32135-X  
8  
9  
10  
11  
12  
13  
14  
15  
16  
17  
18  
19  
20  
21  
22  
23  
24  
25  
26  
27  
28  
29  
30  
31  
32  
33  
34  
35  
36  
37  
38  
39  
40  
41  
42  
43  
44  
45  
46  
47  
48  
49  
50  
51  
52  
53  
54  
55  
56  
57  
58  
59  
60

For peer review only



UACR: Urine albumin/creatinine ratio, 24h ABPM: 24-hour ambulatory blood pressure monitoring, ECG: electrocardiogram, PWA: Pulse wave analysis, PWV: Pulse wave velocity, RAAS-blockade: Renin angiotensin aldosterone system blockade (losartan and/or spironolactone).

259x218mm (72 x 72 DPI)

# Reporting checklist for protocol of a clinical trial.

Based on the SPIRIT guidelines.

## Instructions to authors

Complete this checklist by entering the page numbers from your manuscript where readers will find each of the items listed below.

Your article may not currently address all the items on the checklist. Please modify your text to include the missing information. If you are certain that an item does not apply, please write "n/a" and provide a short explanation.

Upload your completed checklist as an extra file when you submit to a journal.

In your methods section, say that you used the SPIRIT reporting guidelines, and cite them as:

Chan A-W, Tetzlaff JM, Gøtzsche PC, Altman DG, Mann H, Berlin J, Dickersin K, Hróbjartsson A, Schulz KF, Parulekar WR, Krleža-Jerić K, Laupacis A, Moher D. SPIRIT 2013 Explanation and Elaboration: Guidance for protocols of clinical trials. *BMJ*. 2013;346:e7586

|                                             |                     | Reporting Item                                                                                               | Page Number |
|---------------------------------------------|---------------------|--------------------------------------------------------------------------------------------------------------|-------------|
| <b>Administrative information</b>           |                     |                                                                                                              |             |
| Title                                       | <a href="#">#1</a>  | Descriptive title identifying the study design, population, interventions, and, if applicable, trial acronym | 1           |
| Trial registration                          | <a href="#">#2a</a> | Trial identifier and registry name. If not yet registered, name of intended registry                         | 2, 17       |
| Trial registration: data set                | <a href="#">#2b</a> | All items from the World Health Organization Trial Registration Data Set                                     | 1-17        |
| Protocol version                            | <a href="#">#3</a>  | Date and version identifier                                                                                  | 17          |
| Funding                                     | <a href="#">#4</a>  | Sources and types of financial, material, and other support                                                  | 16          |
| Roles and responsibilities: contributorship | <a href="#">#5a</a> | Names, affiliations, and roles of protocol contributors                                                      | 16          |



|    |                           |                     |                                                                      |    |
|----|---------------------------|---------------------|----------------------------------------------------------------------|----|
| 1  | Roles and                 | <a href="#">#5b</a> | Name and contact information for the trial sponsor                   | 16 |
| 2  | responsibilities:         |                     |                                                                      |    |
| 3  | sponsor contact           |                     |                                                                      |    |
| 4  | information               |                     |                                                                      |    |
| 5  |                           |                     |                                                                      |    |
| 6  |                           |                     |                                                                      |    |
| 7  |                           |                     |                                                                      |    |
| 8  | Roles and                 | <a href="#">#5c</a> | Role of study sponsor and funders, if any, in study design;          | 16 |
| 9  | responsibilities:         |                     | collection, management, analysis, and interpretation of data;        |    |
| 10 | sponsor and funder        |                     | writing of the report; and the decision to submit the report for     |    |
| 11 |                           |                     | publication, including whether they will have ultimate authority     |    |
| 12 |                           |                     | over any of these activities                                         |    |
| 13 |                           |                     |                                                                      |    |
| 14 |                           |                     |                                                                      |    |
| 15 |                           |                     |                                                                      |    |
| 16 | Roles and                 | <a href="#">#5d</a> | Composition, roles, and responsibilities of the coordinating centre, | 11 |
| 17 | responsibilities:         |                     | steering committee, endpoint adjudication committee, data            |    |
| 18 | committees                |                     | management team, and other individuals or groups overseeing the      |    |
| 19 |                           |                     | trial, if applicable (see Item 21a for data monitoring committee)    |    |
| 20 |                           |                     |                                                                      |    |
| 21 |                           |                     |                                                                      |    |
| 22 |                           |                     |                                                                      |    |
| 23 | <b>Introduction</b>       |                     |                                                                      |    |
| 24 |                           |                     |                                                                      |    |
| 25 | Background and            | <a href="#">#6a</a> | Description of research question and justification for undertaking   | 3  |
| 26 | rationale                 |                     | the trial, including summary of relevant studies (published and      |    |
| 27 |                           |                     | unpublished) examining benefits and harms for each intervention      |    |
| 28 |                           |                     |                                                                      |    |
| 29 |                           |                     |                                                                      |    |
| 30 | Background and            | <a href="#">#6b</a> | Explanation for choice of comparators                                | 3  |
| 31 | rationale: choice of      |                     |                                                                      |    |
| 32 | comparators               |                     |                                                                      |    |
| 33 |                           |                     |                                                                      |    |
| 34 |                           |                     |                                                                      |    |
| 35 |                           |                     |                                                                      |    |
| 36 | Objectives                | <a href="#">#7</a>  | Specific objectives or hypotheses                                    | 4  |
| 37 |                           |                     |                                                                      |    |
| 38 | Trial design              | <a href="#">#8</a>  | Description of trial design including type of trial (eg, parallel    | 4  |
| 39 |                           |                     | group, crossover, factorial, single group), allocation ratio, and    |    |
| 40 |                           |                     | framework (eg, superiority, equivalence, non-inferiority,            |    |
| 41 |                           |                     | exploratory)                                                         |    |
| 42 |                           |                     |                                                                      |    |
| 43 |                           |                     |                                                                      |    |
| 44 |                           |                     |                                                                      |    |
| 45 | <b>Methods:</b>           |                     |                                                                      |    |
| 46 | <b>Participants,</b>      |                     |                                                                      |    |
| 47 | <b>interventions, and</b> |                     |                                                                      |    |
| 48 | <b>outcomes</b>           |                     |                                                                      |    |
| 49 |                           |                     |                                                                      |    |
| 50 |                           |                     |                                                                      |    |
| 51 |                           |                     |                                                                      |    |
| 52 | Study setting             | <a href="#">#9</a>  | Description of study settings (eg, community clinic, academic        | 5  |
| 53 |                           |                     | hospital) and list of countries where data will be collected.        |    |
| 54 |                           |                     | Reference to where list of study sites can be obtained               |    |
| 55 |                           |                     |                                                                      |    |
| 56 |                           |                     |                                                                      |    |
| 57 | Eligibility criteria      | <a href="#">#10</a> | Inclusion and exclusion criteria for participants. If applicable,    | 5  |
| 58 |                           |                     | eligibility criteria for study centres and individuals who will      |    |
| 59 |                           |                     |                                                                      |    |
| 60 |                           |                     |                                                                      |    |

perform the interventions (eg, surgeons, psychotherapists)

|    |                      |                      |                                                                       |
|----|----------------------|----------------------|-----------------------------------------------------------------------|
| 1  |                      |                      |                                                                       |
| 2  |                      |                      |                                                                       |
| 3  | Interventions:       | <a href="#">#11a</a> | Interventions for each group with sufficient detail to allow          |
| 4  | description          |                      | replication, including how and when they will be administered         |
| 5  |                      |                      |                                                                       |
| 6  | Interventions:       | <a href="#">#11b</a> | Criteria for discontinuing or modifying allocated interventions for a |
| 7  | modifications        |                      | given trial participant (eg, drug dose change in response to harms,   |
| 8  |                      |                      | participant request, or improving / worsening disease)                |
| 9  |                      |                      |                                                                       |
| 10 |                      |                      |                                                                       |
| 11 | Interventions:       | <a href="#">#11c</a> | Strategies to improve adherence to intervention protocols, and any    |
| 12 | adherence            |                      | procedures for monitoring adherence (eg, drug tablet return;          |
| 13 |                      |                      | laboratory tests)                                                     |
| 14 |                      |                      |                                                                       |
| 15 |                      |                      |                                                                       |
| 16 |                      |                      |                                                                       |
| 17 | Interventions:       | <a href="#">#11d</a> | Relevant concomitant care and interventions that are permitted or     |
| 18 | concomitant care     |                      | prohibited during the trial                                           |
| 19 |                      |                      |                                                                       |
| 20 |                      |                      |                                                                       |
| 21 | Outcomes             | <a href="#">#12</a>  | Primary, secondary, and other outcomes, including the specific        |
| 22 |                      |                      | measurement variable (eg, systolic blood pressure), analysis metric   |
| 23 |                      |                      | (eg, change from baseline, final value, time to event), method of     |
| 24 |                      |                      | aggregation (eg, median, proportion), and time point for each         |
| 25 |                      |                      | outcome. Explanation of the clinical relevance of chosen efficacy     |
| 26 |                      |                      | and harm outcomes is strongly recommended                             |
| 27 |                      |                      |                                                                       |
| 28 |                      |                      |                                                                       |
| 29 |                      |                      |                                                                       |
| 30 |                      |                      |                                                                       |
| 31 | Participant timeline | <a href="#">#13</a>  | Time schedule of enrolment, interventions (including any run-ins      |
| 32 |                      |                      | and washouts), assessments, and visits for participants. A            |
| 33 |                      |                      | schematic diagram is highly recommended (see Figure)                  |
| 34 |                      |                      |                                                                       |
| 35 |                      |                      |                                                                       |
| 36 | Sample size          | <a href="#">#14</a>  | Estimated number of participants needed to achieve study              |
| 37 |                      |                      | objectives and how it was determined, including clinical and          |
| 38 |                      |                      | statistical assumptions supporting any sample size calculations       |
| 39 |                      |                      |                                                                       |
| 40 |                      |                      |                                                                       |
| 41 | Recruitment          | <a href="#">#15</a>  | Strategies for achieving adequate participant enrolment to reach      |
| 42 |                      |                      | target sample size                                                    |
| 43 |                      |                      |                                                                       |
| 44 |                      |                      |                                                                       |

## Methods: Assignment of interventions (for controlled trials)

|    |                      |                      |                                                                      |
|----|----------------------|----------------------|----------------------------------------------------------------------|
| 45 |                      |                      |                                                                      |
| 46 |                      |                      |                                                                      |
| 47 |                      |                      |                                                                      |
| 48 |                      |                      |                                                                      |
| 49 |                      |                      |                                                                      |
| 50 | Allocation: sequence | <a href="#">#16a</a> | Method of generating the allocation sequence (eg, computer-          |
| 51 | generation           |                      | generated random numbers), and list of any factors for               |
| 52 |                      |                      | stratification. To reduce predictability of a random sequence,       |
| 53 |                      |                      | details of any planned restriction (eg, blocking) should be provided |
| 54 |                      |                      | in a separate document that is unavailable to those who enrol        |
| 55 |                      |                      | participants or assign interventions                                 |
| 56 |                      |                      |                                                                      |
| 57 |                      |                      |                                                                      |
| 58 |                      |                      |                                                                      |
| 59 |                      |                      |                                                                      |
| 60 |                      |                      |                                                                      |

|    |                        |                      |                                                                       |     |
|----|------------------------|----------------------|-----------------------------------------------------------------------|-----|
| 1  | Allocation concealment | <a href="#">#16b</a> | Mechanism of implementing the allocation sequence (eg, central        | 6   |
| 2  | mechanism              |                      | telephone; sequentially numbered, opaque, sealed envelopes),          |     |
| 3  |                        |                      | describing any steps to conceal the sequence until interventions are  |     |
| 4  |                        |                      | assigned                                                              |     |
| 5  |                        |                      |                                                                       |     |
| 6  |                        |                      |                                                                       |     |
| 7  |                        |                      |                                                                       |     |
| 8  | Allocation:            | <a href="#">#16c</a> | Who will generate the allocation sequence, who will enrol             | 6   |
| 9  | implementation         |                      | participants, and who will assign participants to interventions       |     |
| 10 |                        |                      |                                                                       |     |
| 11 | Blinding (masking)     | <a href="#">#17a</a> | Who will be blinded after assignment to interventions (eg, trial      | 4   |
| 12 |                        |                      | participants, care providers, outcome assessors, data analysts), and  |     |
| 13 |                        |                      | how                                                                   |     |
| 14 |                        |                      |                                                                       |     |
| 15 |                        |                      |                                                                       |     |
| 16 |                        |                      |                                                                       |     |
| 17 | Blinding (masking):    | <a href="#">#17b</a> | If blinded, circumstances under which unblinding is permissible,      | N/A |
| 18 | emergency unblinding   |                      | and procedure for revealing a participant's allocated intervention    |     |
| 19 |                        |                      | during the trial                                                      |     |
| 20 |                        |                      |                                                                       |     |
| 21 |                        |                      |                                                                       |     |
| 22 | <b>Methods: Data</b>   |                      |                                                                       |     |
| 23 | <b>collection,</b>     |                      |                                                                       |     |
| 24 | <b>management, and</b> |                      |                                                                       |     |
| 25 | <b>analysis</b>        |                      |                                                                       |     |
| 26 |                        |                      |                                                                       |     |
| 27 |                        |                      |                                                                       |     |
| 28 |                        |                      |                                                                       |     |
| 29 | Data collection plan   | <a href="#">#18a</a> | Plans for assessment and collection of outcome, baseline, and other   | 8   |
| 30 |                        |                      | trial data, including any related processes to promote data quality   |     |
| 31 |                        |                      | (eg, duplicate measurements, training of assessors) and a             |     |
| 32 |                        |                      | description of study instruments (eg, questionnaires, laboratory      |     |
| 33 |                        |                      | tests) along with their reliability and validity, if known. Reference |     |
| 34 |                        |                      | to where data collection forms can be found, if not in the protocol   |     |
| 35 |                        |                      |                                                                       |     |
| 36 |                        |                      |                                                                       |     |
| 37 |                        |                      |                                                                       |     |
| 38 |                        |                      |                                                                       |     |
| 39 | Data collection plan:  | <a href="#">#18b</a> | Plans to promote participant retention and complete follow-up,        | 10  |
| 40 | retention              |                      | including list of any outcome data to be collected for participants   |     |
| 41 |                        |                      | who discontinue or deviate from intervention protocols                |     |
| 42 |                        |                      |                                                                       |     |
| 43 |                        |                      |                                                                       |     |
| 44 | Data management        | <a href="#">#19</a>  | Plans for data entry, coding, security, and storage, including any    | 10  |
| 45 |                        |                      | related processes to promote data quality (eg, double data entry;     |     |
| 46 |                        |                      | range checks for data values). Reference to where details of data     |     |
| 47 |                        |                      | management procedures can be found, if not in the protocol            |     |
| 48 |                        |                      |                                                                       |     |
| 49 |                        |                      |                                                                       |     |
| 50 |                        |                      |                                                                       |     |
| 51 | Statistics: outcomes   | <a href="#">#20a</a> | Statistical methods for analysing primary and secondary outcomes.     | 10  |
| 52 |                        |                      | Reference to where other details of the statistical analysis plan can |     |
| 53 |                        |                      | be found, if not in the protocol                                      |     |
| 54 |                        |                      |                                                                       |     |
| 55 |                        |                      |                                                                       |     |
| 56 | Statistics: additional | <a href="#">#20b</a> | Methods for any additional analyses (eg, subgroup and adjusted        | 10  |
| 57 | analyses               |                      | analyses)                                                             |     |
| 58 |                        |                      |                                                                       |     |
| 59 |                        |                      |                                                                       |     |
| 60 |                        |                      |                                                                       |     |

|    |                            |                      |                                                                         |     |
|----|----------------------------|----------------------|-------------------------------------------------------------------------|-----|
| 1  | Statistics: analysis       | <a href="#">#20c</a> | Definition of analysis population relating to protocol non-             | 10  |
| 2  | population and missing     |                      | adherence (eg, as randomised analysis), and any statistical methods     |     |
| 3  | data                       |                      | to handle missing data (eg, multiple imputation)                        |     |
| 4  |                            |                      |                                                                         |     |
| 5  |                            |                      |                                                                         |     |
| 6  | <b>Methods: Monitoring</b> |                      |                                                                         |     |
| 7  |                            |                      |                                                                         |     |
| 8  | Data monitoring:           | <a href="#">#21a</a> | Composition of data monitoring committee (DMC); summary of its          | 11  |
| 9  | formal committee           |                      | role and reporting structure; statement of whether it is independent    |     |
| 10 |                            |                      | from the sponsor and competing interests; and reference to where        |     |
| 11 |                            |                      | further details about its charter can be found, if not in the protocol. |     |
| 12 |                            |                      | Alternatively, an explanation of why a DMC is not needed                |     |
| 13 |                            |                      |                                                                         |     |
| 14 | Data monitoring:           | <a href="#">#21b</a> | Description of any interim analyses and stopping guidelines,            | 11  |
| 15 | interim analysis           |                      | including who will have access to these interim results and make        |     |
| 16 |                            |                      | the final decision to terminate the trial                               |     |
| 17 |                            |                      |                                                                         |     |
| 18 |                            |                      |                                                                         |     |
| 19 |                            |                      |                                                                         |     |
| 20 |                            |                      |                                                                         |     |
| 21 |                            |                      |                                                                         |     |
| 22 | Harms                      | <a href="#">#22</a>  | Plans for collecting, assessing, reporting, and managing solicited      | 10  |
| 23 |                            |                      | and spontaneously reported adverse events and other unintended          |     |
| 24 |                            |                      | effects of trial interventions or trial conduct                         |     |
| 25 |                            |                      |                                                                         |     |
| 26 |                            |                      |                                                                         |     |
| 27 | Auditing                   | <a href="#">#23</a>  | Frequency and procedures for auditing trial conduct, if any, and        | 11  |
| 28 |                            |                      | whether the process will be independent from investigators and the      |     |
| 29 |                            |                      | sponsor                                                                 |     |
| 30 |                            |                      |                                                                         |     |
| 31 |                            |                      |                                                                         |     |
| 32 |                            |                      |                                                                         |     |
| 33 | <b>Ethics and</b>          |                      |                                                                         |     |
| 34 | <b>dissemination</b>       |                      |                                                                         |     |
| 35 |                            |                      |                                                                         |     |
| 36 | Research ethics            | <a href="#">#24</a>  | Plans for seeking research ethics committee / institutional review      | 12  |
| 37 | approval                   |                      | board (REC / IRB) approval                                              |     |
| 38 |                            |                      |                                                                         |     |
| 39 |                            |                      |                                                                         |     |
| 40 | Protocol amendments        | <a href="#">#25</a>  | Plans for communicating important protocol modifications (eg,           | 12  |
| 41 |                            |                      | changes to eligibility criteria, outcomes, analyses) to relevant        |     |
| 42 |                            |                      | parties (eg, investigators, REC / IRBs, trial participants, trial       |     |
| 43 |                            |                      | registries, journals, regulators)                                       |     |
| 44 |                            |                      |                                                                         |     |
| 45 |                            |                      |                                                                         |     |
| 46 |                            |                      |                                                                         |     |
| 47 | Consent or assent          | <a href="#">#26a</a> | Who will obtain informed consent or assent from potential trial         | 12  |
| 48 |                            |                      | participants or authorised surrogates, and how (see Item 32)            |     |
| 49 |                            |                      |                                                                         |     |
| 50 |                            |                      |                                                                         |     |
| 51 | Consent or assent:         | <a href="#">#26b</a> | Additional consent provisions for collection and use of participant     | N/A |
| 52 | ancillary studies          |                      | data and biological specimens in ancillary studies, if applicable       |     |
| 53 |                            |                      |                                                                         |     |
| 54 |                            |                      |                                                                         |     |
| 55 | Confidentiality            | <a href="#">#27</a>  | How personal information about potential and enrolled participants      | 10  |
| 56 |                            |                      | will be collected, shared, and maintained in order to protect           |     |
| 57 |                            |                      | confidentiality before, during, and after the trial                     |     |
| 58 |                            |                      |                                                                         |     |
| 59 |                            |                      |                                                                         |     |
| 60 |                            |                      |                                                                         |     |

|    |                                             |                      |                                                                                                                                                                                                                                                                                     |     |
|----|---------------------------------------------|----------------------|-------------------------------------------------------------------------------------------------------------------------------------------------------------------------------------------------------------------------------------------------------------------------------------|-----|
| 1  | Declaration of interests                    | <a href="#">#28</a>  | Financial and other competing interests for principal investigators for the overall trial and each study site                                                                                                                                                                       | 16  |
| 2  |                                             |                      |                                                                                                                                                                                                                                                                                     |     |
| 3  |                                             |                      |                                                                                                                                                                                                                                                                                     |     |
| 4  | Data access                                 | <a href="#">#29</a>  | Statement of who will have access to the final trial dataset, and disclosure of contractual agreements that limit such access for investigators                                                                                                                                     | 12  |
| 5  |                                             |                      |                                                                                                                                                                                                                                                                                     |     |
| 6  |                                             |                      |                                                                                                                                                                                                                                                                                     |     |
| 7  |                                             |                      |                                                                                                                                                                                                                                                                                     |     |
| 8  |                                             |                      |                                                                                                                                                                                                                                                                                     |     |
| 9  |                                             |                      |                                                                                                                                                                                                                                                                                     |     |
| 10 | Ancillary and post trial care               | <a href="#">#30</a>  | Provisions, if any, for ancillary and post-trial care, and for compensation to those who suffer harm from trial participation                                                                                                                                                       | N/A |
| 11 |                                             |                      |                                                                                                                                                                                                                                                                                     |     |
| 12 |                                             |                      |                                                                                                                                                                                                                                                                                     |     |
| 13 |                                             |                      |                                                                                                                                                                                                                                                                                     |     |
| 14 | Dissemination policy: trial results         | <a href="#">#31a</a> | Plans for investigators and sponsor to communicate trial results to participants, healthcare professionals, the public, and other relevant groups (eg, via publication, reporting in results databases, or other data sharing arrangements), including any publication restrictions | 12  |
| 15 |                                             |                      |                                                                                                                                                                                                                                                                                     |     |
| 16 |                                             |                      |                                                                                                                                                                                                                                                                                     |     |
| 17 |                                             |                      |                                                                                                                                                                                                                                                                                     |     |
| 18 |                                             |                      |                                                                                                                                                                                                                                                                                     |     |
| 19 |                                             |                      |                                                                                                                                                                                                                                                                                     |     |
| 20 |                                             |                      |                                                                                                                                                                                                                                                                                     |     |
| 21 | Dissemination policy: authorship            | <a href="#">#31b</a> | Authorship eligibility guidelines and any intended use of professional writers                                                                                                                                                                                                      | 16  |
| 22 |                                             |                      |                                                                                                                                                                                                                                                                                     |     |
| 23 |                                             |                      |                                                                                                                                                                                                                                                                                     |     |
| 24 | Dissemination policy: reproducible research | <a href="#">#31c</a> | Plans, if any, for granting public access to the full protocol, participant-level dataset, and statistical code                                                                                                                                                                     | N/A |
| 25 |                                             |                      |                                                                                                                                                                                                                                                                                     |     |
| 26 |                                             |                      |                                                                                                                                                                                                                                                                                     |     |
| 27 |                                             |                      |                                                                                                                                                                                                                                                                                     |     |
| 28 | <b>Appendices</b>                           |                      |                                                                                                                                                                                                                                                                                     |     |
| 29 |                                             |                      |                                                                                                                                                                                                                                                                                     |     |
| 30 |                                             |                      |                                                                                                                                                                                                                                                                                     |     |
| 31 | Informed consent materials                  | <a href="#">#32</a>  | Model consent form and other related documentation given to participants and authorised surrogates                                                                                                                                                                                  | 18  |
| 32 |                                             |                      |                                                                                                                                                                                                                                                                                     |     |
| 33 |                                             |                      |                                                                                                                                                                                                                                                                                     |     |
| 34 | Biological specimens                        | <a href="#">#33</a>  | Plans for collection, laboratory evaluation, and storage of biological specimens for genetic or molecular analysis in the current trial and for future use in ancillary studies, if applicable                                                                                      | N/A |
| 35 |                                             |                      |                                                                                                                                                                                                                                                                                     |     |
| 36 |                                             |                      |                                                                                                                                                                                                                                                                                     |     |
| 37 |                                             |                      |                                                                                                                                                                                                                                                                                     |     |
| 38 |                                             |                      |                                                                                                                                                                                                                                                                                     |     |
| 39 |                                             |                      |                                                                                                                                                                                                                                                                                     |     |

40 The SPIRIT Explanation and Elaboration paper is distributed under the terms of the Creative Commons  
 41 Attribution License CC-BY-NC. This checklist was completed on 17. September 2021 using  
 42 <https://www.goodreports.org/>, a tool made by the [EQUATOR Network](#) in collaboration with [Penelope.ai](#)  
 43  
 44  
 45  
 46  
 47  
 48  
 49  
 50  
 51  
 52  
 53  
 54  
 55  
 56  
 57  
 58  
 59
